# Supplementary material for: Educating the masses to address a global public health priority: The Preventing Dementia Massive Open Online Course (MOOC)
Source: PubMed Central journal article supplement (PMC9067672; doi:10.1371/journal.pone.0267205), 2022-05-04
Supplement: pone.0267205.s001.pdf [file pone.0267205.s001.pdf]

Packages and versions used:

```
$`package:reshape2` version 1.4.4
```

```
[1] "melt"
```

```
$`package:table1` version 1.2
```

```
[1] "table1"
```

```
$`package:base`
```

```
[1] "as.character" "as.factor" "as.numeric" "cbind" "cut" "data.frame" "duplicated"  
"exp" "expand.grid" "factor" "is.na"
```

```
[12] "jitter" "lapply" "length" "list" "load" "log" "matrix" "ncol"  
"nrow" "paste0" "print"
```

```
[23] "rep" "return" "round" "sample" "save" "scale" "seq" "set.seed"  
"summary" "unlist"
```

```
$`package:dplyr` version 1.0.4
```

```
[1] "bind_rows" "count" "left_join" "na_if" "recode" "sample_n" "semi_join" "tally" "filter"  
"group_by" "mutate" "select" "rename"
```

```
$`package:emmeans` version 1.4.6
```

```
[1] "emmeans"
```

```
$`package:ggplot2` version 3.3.5
```

```
[1] "aes" "element_blank" "element_text" "facet_wrap" "geom_bar"  
"geom_errorbar" "geom_jitter" "geom_line"
```

```
[9] "geom_point" "geom_ribbon" "geom_smooth" "geom_vline" "ggplot"  
"ggsave" "guide_legend" "guides"
```

```
[17] "labs" "scale_x_discrete" "scale_y_continuous" "theme" "xlab" "xlim"  
"ylab" "unit"
```

```
$`package:ggpubr` version 0.4.0
```

[1] "ggarrange"

\$`package:graphics` version 3.5.3

[1] "plot"

\$`package:grDevices` version 3.5.3

[1] "png"

\$`package:knitr` version 1.28

[1] "kable"

\$`package:mgcv` version 1.8-31

[1] "gam" "s"

\$`package:oddsratio` version 2.0.1

[1] "or\_gam" "or\_glm"

\$`package:purrr` version 0.3.4

[1] "map" "map\_chr"

\$`package:quantreg` version 5.55

[1] "rq"

\$`package:stats` version 3.5.3

[1] "binomial" "complete.cases" "confint" "glm" "model.frame" "predict" "qqline"  
"qqnorm" "model.matrix"

\$`package:stm` version 1.3.3

[1] "findThoughts" "manyTopics" "prepDocuments" "textProcessor"

\$`package:stmQuality` version 0.0.0.9000

```
[1] "extractFit" "findThoughts0"
```

```
$`package:tidyr` version 1.0.2
```

```
[1] "nest" "pivot_longer" "pivot_wider" "replace_na"
```

```
$`package:tidytext` version 0.2.4
```

```
[1] "unnest_tokens"
```

```
$`package:tm` version 0.7-7
```

```
[1] "stopwords"
```

```
$`package:utils` version 3.5.3
```

```
[1] "read.csv" "write.csv"
```

```
$`package:maps` version 3.3.0
```

```
[1] "iso3166"
```

```
load these packages
```

```
``{r}
```

```
library(reshape2)
```

```
library(table1)
```

```
library(dplyr)
```

```
library(emmeans)
```

```
library(ggplot2)
```

```
library(ggpubr)
```

```
library(graphics)
```

```
library(grDevices)
```

```
library(knitr)
```

```
library(mgcv)
```

```
library(oddsratio)
```

```
library(purrr)
```

```
library(quantreg)
library(stats)
library(stm)
library(stmQuality)
library(tidyr)
library(tidytext)
library(tm)
library(utils)
library(maps)
```

```
...
```

Load data

```
``{r}
load("combined_first_enrolment")
```

```
...
```

Produce a demographic table for enrolments and completions

This section uses each user's first enrolment, as this gives the most accurate completion:non-completion ratio

```
``{r}
d <- combined_first_enrolment
d$completed <- as.factor(d$completed) %>%
  dplyr::recode("0" = "Non-complete",
               "1" = "Complete")
```

```

d$Gender <- as.factor(d$gender)
d$Occupation <- as.factor(d$anzsic_div_q_occ) %>%
  dplyr::recode("1" = "Health occupation",
    "0" = "Other occupation")
d$Education <- as.factor(d$post_secondary_edu) %>%
  dplyr::recode("1" = "Post-secondary education",
    "0" = "Lower level of education")
d$MOOC <- as.factor(d$mooc)
d$Quiz_A <- d$quiz_1_percent
d$Quiz_B <- d$quiz_3_percent
d$Quiz_C <- d$quiz_4_percent
d$Age <- d$age

t3 <- table1::table1(~Age + Gender + Occupation + Education + Quiz_A + Quiz_B + Quiz_C + MOOC |
  completed, data = d,
  render.continuous = c("Mean (standard deviation)" = "Mean (SD)"),
  topclass="Rtable1-zebra")
t3

```

...

Analyse and graph enrolment data by country and by GDP per capita of country of origin

Again, use each participant's first enrolment for consistency

```

``{r}
load("combined_first_enrolment")
load("combined_first_completion")

all_users_quiz <- combined_first_enrolment

#country data

```

```

a <- all_users_quiz %>% dplyr::group_by(country) %>% tally()
a <- a %>% dplyr::filter(!is.na(country))

#this was inspected to give numbers of participants from each country, but 2 letter codes are hard to
interpret

#country names and three letter codes added to dataset
country_codes <- read.csv("country_codes.csv")
country_codes$country <- as.character(country_codes$country)
country_codes %>% dplyr::filter(duplicated(country)) #8 duplicates removed
country_codes <- country_codes %>% dplyr::filter(!duplicated(country))

countries <- left_join(a, country_codes)

nrow(countries) #people from 171 different countries have enrolled in the mooc
nrow(countries)/nrow(country_codes)*100
#people from 67% of all counties have enrolled in the MOOC

b <- countries %>% dplyr::group_by(continent) %>% tally()
b
#6 continents represented - every continent except Antarctica

#Include a continuous variable based on country (GDP per capita) for further analysis. Two many
levels in country for it to provide useful comparisons.
#GDP data from world bank https://data.worldbank.org/indicator/NY.GDP.PCAP.CD?view=map
gdp_per_capita <- read.csv("gdp_per_capita.csv")

#prepare to join GDP per capita to other data using 2 letter country codes
names <- iso3166
names <- names %>%
  dplyr::mutate(country_name = mapname) %>%
  dplyr::select(country_name, a2, a3)

```

```
gdp_per_capita <- gdp_per_capita %>%
  dplyr::mutate("a3" = Country.Code) %>%
  dplyr::select(a3, X2018)
```

```
gdp_per_capita <- left_join(names, gdp_per_capita) %>%
  dplyr::mutate(country = a2) %>%
  dplyr::select(country, X2018)
```

```
#inspect GDP per capita across mooc iterations
```

```
gdp_mooc <- all_users_quiz %>% dplyr::select(mooc, country)
```

```
gdp_mooc$mooc <- gdp_mooc$mooc %>%
```

```
  dplyr::recode("2016_07" = "1",
    "2017_03" = "2",
    "2018_05" = "3",
    "2018_10" = "4",
    "2019_05" = "5",
    "2019_10" = "6",
    "2020_05" = "7")
```

```
gdp_mooc <- gdp_mooc %>%
```

```
  dplyr::group_by(mooc, country) %>%
  tally()
```

```
gdp_mooc <- left_join(gdp_mooc, gdp_per_capita)
```

```
ggplot(gdp_mooc, aes(x = mooc, y = X2018)) +
  geom_jitter(aes(colour = log(n)))
```

```
#possibly more people from lower GDP per capita countries in later iterations
```

```
#add a column showing the income classification of each country using the current world bank
classifications from 10.2.2021 (based on GNI from 2019)
```

```
income_categories <- read.csv("income_categories.csv")
```

```
income_categories <- income_categories %>% dplyr::select(a3, country_income_group)
```

```
income_categories <- left_join(names, income_categories) %>%
```

```
  dplyr::mutate(country = a2) %>%
```

```
  dplyr::select(country, country_income_group)
```

```
#remove duplicates
```

```
income_categories <- income_categories %>% dplyr::filter(!duplicated(country))
```

```
#create a data set for further analysis
```

```
d1 <- all_users_quiz %>%
```

```
  dplyr::select(user_id, mooc, country)
```

```
b <- gdp_per_capita %>% dplyr::filter(duplicated(country))
```

```
c <- semi_join(gdp_per_capita, b) #some countries are included in this dataset twice, but all  
duplicates are equivalent
```

```
gdp_per_capita <- gdp_per_capita %>% dplyr::filter(!duplicated(country))
```

```
d1 <- left_join(d1, gdp_per_capita)
```

```
#rescale X2018 to avoid "infintie X" error when calling summary on models
```

```
d1 <- d1 %>% dplyr::mutate(gdp_scaled = scale(X2018))
```

```
combined_first_enrolment_gdp <- d1
```

```
combined_first_enrolment_gdp <- combined_first_enrolment_gdp %>%
```

```
  dplyr::select(user_id, X2018, gdp_scaled) %>%
```

```
  dplyr::mutate(gdp_country = X2018) %>%
```

```
  dplyr::select(-X2018)
```



```
combined_first_enrolment <- left_join(combined_first_enrolment, combined_first_enrolment_gdp)
```

```
combined_first_enrolment <- left_join(combined_first_enrolment, income_categories)
```

```
#order factor levels
```

```
combined_first_enrolment$country_income_group <-
```

```
factor(combined_first_enrolment$country_income_group, levels = c("Low income", "Lower middle  
income", "Upper middle income", "High income"))
```

```
#plot the distribution of enrolments across country income categories
```

```
ggplot(combined_first_enrolment, aes(x = country_income_group)) + geom_bar()
```

```
#save combined_first_enrolment with country_income_group
```

```
save(combined_first_enrolment, file = "combined_first_enrolment")
```

```
#add income categories into combined_first_completion too
```

```
gdp_mooc_comp <- combined_first_completion %>%
```

```
  dplyr::select(user_id, mooc, country)
```

```
d1 <- left_join(gdp_mooc_comp, gdp_per_capita)
```

```
d1 <- d1 %>% dplyr::mutate(gdp_scaled = scale(X2018))
```

```
combined_first_completion_gdp <- d1
```

```
combined_first_completion_gdp <- combined_first_completion_gdp %>%
```

```
  dplyr::mutate(gdp_country = X2018) %>%
```

```
  dplyr::select(-X2018)
```

```
combined_first_completion_gdp <- left_join(combined_first_completion_gdp,  
combined_first_enrolment_gdp)  
  
combined_first_completion_gdp <- left_join(combined_first_completion_gdp, income_categories,  
by = "country")
```

```
combined_first_completion_gpd <- combined_first_completion_gdp %>%  
  dplyr::select(-gdp_scaled, -gdp_country)
```

```
combined_first_completion <- left_join(combined_first_completion,  
combined_first_completion_gpd)
```

```
save(combined_first_completion, file = "combined_first_completion")  
...
```

Explore data - demographics across iterations

```
``{r}
```

```
load("combined_first_enrolment")
```

```
#recode gender for table
```

```
combined_first_enrolment$gender <- na_if(combined_first_enrolment$gender, "other")
```

```
combined_first_enrolment$gender <- factor(combined_first_enrolment$gender)
```

```
#Combine relevant data
```

```
d1 <- combined_first_enrolment %>%
```

```
  dplyr::select(user_id, age, gender, post_secondary_edu, anzsic_div_q_occ, mooc, gdp_country,  
completed, country_income_group) %>%
```

```
  dplyr::mutate(edu = dplyr::recode(post_secondary_edu, yes = "1", no = "0")) %>%
```

```
  dplyr::mutate(mooc = as.factor(mooc),
```

```
    gender = gender,
```

```
    edu = post_secondary_edu,
```

```
    occ = as.character(anssic_div_q_occ)) %>%
```

```

dplyr::select(user_id, age, gender, edu, occ, mooc, gdp_country, country_income_group)

d2 <- d1

#Create a demographic table across different MOOC iterations
d <- d2
d$mooc <- as.factor(d$mooc)
d$Gender <- as.factor(d$gender) %>%
  recode("female" = "Female",
         "male" = "Male")
d$Occupation <- as.factor(d$occ) %>%
  dplyr::recode("1" = "Health occupation",
               "0" = "Non-health occupation")
d$Education <- as.factor(d$edu) %>%
  dplyr::recode("1" = "Post-secondary education",
               "0" = "Lower level of education")
d$Age <- d$age
d$`Country of residence` <- d$country_income_group %>% recode("Lower middle income" = "Low
or middle income", "Upper middle income" = "Low or middle income", "Low income" = "Low or
middle income")
d$`MOOC iteration` <- d$mooc

#reorder as necessary
d$Occupation <- factor(d$Occupation, levels = c("Health occupation", "Non-health occupation"))
d$Education <- factor(d$Education, levels = c("Post-secondary education", "Lower level of
education"))
d$`Country of residence` <- factor(d$`Country of residence`, levels = c("High income", "Low or
middle income"))

t3 <- table1::table1(~Age + Gender + Occupation + Education + `Country of residence` | `MOOC
iteration`, data = d,
                    render.continuous = c("Mean (standard deviation)" = "Mean (SD)"),

```

```

topclass="Rtable1-zebra")
t3

#Create a demographic table across different MOOC iterations - create a table that only has
complete cases as the model only used complete cases
d <- d %>% dplyr::filter(complete.cases(d))
d$mooc <- as.factor(d$mooc)
d$Gender <- as.factor(d$gender)
d$Occupation <- as.factor(d$occ) %>%
  dplyr::recode("1" = "Health occupation",
    "0" = "Other occupation")
d$Education <- as.factor(d$edu) %>%
  dplyr::recode("1" = "Post-secondary education",
    "0" = "Lower level of education")
d$Age <- d$age

t3 <- table1::table1(~Age + Gender + Occupation + Education + gdp_country | mooc, data = d,
  render.continuous = c("Mean (standard deviation)" = "Mean (SD)"),
  topclass="Rtable1-zebra")
t3

...

Explore data - demographics of completion

``{r}

load("combined_first_enrolment")

#recode gender for table
combined_first_enrolment$gender <- na_if(combined_first_enrolment$gender, "other")
combined_first_enrolment$gender <- factor(combined_first_enrolment$gender)

```

```
#Combine relevent data
```

```
d <- combined_first_enrolment %>%
```

```
  dplyr::select(user_id, age, gender, post_secondary_edu, anzsic_div_q_occ, mooc, completed,  
country_income_group, gdp_country) %>%
```

```
  dplyr::mutate(edu = post_secondary_edu) %>%
```

```
  dplyr::mutate(mooc = as.factor(mooc),
```

```
    gender = gender,
```

```
    edu = post_secondary_edu,
```

```
    occ = as.character(anzsic_div_q_occ),
```

```
    completed = as.factor(completed)) %>%
```

```
  dplyr::select(user_id, age, gender, edu, occ, mooc, completed, gdp_country,  
country_income_group)
```

```
d$age <- as.numeric(d$age)
```

```
#Create a demographic table comparing completions and non-completions
```

```
d$completed <- as.factor(d$completed) %>%
```

```
  dplyr::recode("1" = "Completed", "0" = "Not completed")
```

```
d$mooc <- as.factor(d$mooc)
```

```
d$Gender <- as.factor(d$gender) %>%
```

```
  recode("female" = "Female",
```

```
    "male" = "Male")
```

```
d$Occupation <- as.factor(d$occ) %>%
```

```
  dplyr::recode("1" = "Health occupation",
```

```
    "0" = "Non-health occupation")
```

```
d$Education <- as.factor(d$edu) %>%
```

```
  dplyr::recode("1" = "Post-secondary education",
```

```
    "0" = "Lower level of education")
```

```
d$Age <- d$age
```

```
d$`Country of residence` <- d$country_income_group %>% recode("Lower middle income" = "Low or middle income", "Upper middle income" = "Low or middle income", "Low income" = "Low or middle income")
```

```
d$`MOOC iteration` <- d$mooc
```

```
#reorder as necessary
```

```
d$Occupation <- factor(d$Occupation, levels = c("Health occupation", "Non-health occupation"))
```

```
d$Education <- factor(d$Education, levels = c("Post-secondary education", "Lower level of education"))
```

```
d$`Country of residence` <- factor(d$`Country of residence`, levels = c("High income", "Low or middle income"))
```

```
t3 <- table1::table1(~Age + Gender + Occupation + Education + `Country of residence` + `MOOC iteration` | completed, data = d,
```

```
  render.continuous = c("Mean (standard deviation)" = "Mean (SD)"),
```

```
  topclass="Rtable1-zebra")
```

```
t3
```

```
#Create a demographic table across different MOOC iterations - create a table that only has complete cases as the model only used complete cases
```

```
d <- d %>% dplyr::filter(complete.cases(d))
```

```
d$mooc <- as.factor(d$mooc)
```

```
d$Gender <- as.factor(d$gender)
```

```
d$Occupation <- as.factor(d$occ) %>%
```

```
  dplyr::recode("1" = "Health occupation",
```

```
    "0" = "Other occupation")
```

```
d$Education <- as.factor(d$edu) %>%
```

```
  dplyr::recode("1" = "Post-secondary education",
```

```
    "0" = "Lower level of education")
```

```
d$Age <- d$age
```

```
t3 <- table1::table1(~Age + Gender + Occupation + Education + gdp_country + mooc | completed, data = d,
```

```
render.continuous = c("Mean (standard deviation)" = "Mean (SD)",  
  topclass="Rtable1-zebra")
```

```
t3
```

```
...
```

Compare demographics across years using simple individual variable glms and adjusted gams

```
``{r}
```

```
load("combined_first_enrolment")
```

```
windowsFonts("Arial" = windowsFont("Arial"))
```

```
#recode variables for analysis
```

```
combined_first_enrolment$gender <- combined_first_enrolment$gender %>% recode("male" = "0",  
  "female" = "1")
```

```
combined_first_enrolment$gender <- na_if(combined_first_enrolment$gender, "other")
```

```
combined_first_enrolment$gender <- factor(combined_first_enrolment$gender, levels = c("0", "1"))
```

```
combined_first_enrolment$post_secondary_edu <-  
factor(combined_first_enrolment$post_secondary_edu, levels = c("0", "1"))
```

```
combined_first_enrolment$country_income_group <-  
combined_first_enrolment$country_income_group %>% dplyr::recode("High income" = "1", "Lower  
middle income" = "0", "Upper middle income" = "0", "Low income" = "0")
```

```
combined_first_enrolment$anzsic_div_q_occ <-  
factor(combined_first_enrolment$anzsic_div_q_occ, levels = c("0", "1"))
```

```
#model occupation profile across moocs
```

```
d2 <- combined_first_enrolment
```

```
glm1 <- glm(anzsic_div_q_occ ~ mooc, family = binomial(),
```

```
  data = d2)
```

```
summary(glm1)
```

```
d_stim <- data.frame(mooc = (sample(c("2016_07", "2017_03", "2018_05", "2018_10", "2019_05",
"2019_10", "2020_05"), 7, replace = F)))
```

```
#to obtain the correct CIs I have predicted using type = "link", giving mean and se on log scales,
calculated CIs and then back-transformed
```

```
fit <- predict(glm1, d_stim, type = "link", se.fit = T)
```

```
d_stim$emmean <- exp(fit$fit)/(1+exp(fit$fit))
```

```
d_stim$lower.CL <- exp(fit$fit-1.96*fit$se.fit)/(1+exp(fit$fit-1.96*fit$se.fit))
```

```
d_stim$upper.CL <- exp(fit$fit+1.96*fit$se.fit)/(1+exp(fit$fit+1.96*fit$se.fit))
```

```
d_stim
```

```
d_stim_p <- d_stim
```

```
d_stim_p1 <- d_stim_p %>% dplyr::rename("p" = "emmean")
```

```
gg1 <- ggplot(d_stim_p1, aes(x = mooc, y = p)) +
```

```
  geom_point() +
```

```
  geom_errorbar(aes(ymin=lower.CL, ymax=upper.CL), width = 0.2) +
```

```
  labs(title = "", y = "Proportion health workers", x = "Subsequent MOOC iterations") +
```

```
  theme(text=element_text(family="Arial", size = 12),
```

```
        axis.title.x=element_text(size = 9.6, colour = "grey30")) +
```

```
  theme(axis.text.x=element_blank())
```

```
gg1
```

```
#calculate odds ratio
```

```
or_glm(data = d2, model = glm1)
```

```
#does relationship remain significant if you adjust for other demographics which are potential
confounders?
```

```
gam1 <- gam(anzsic_div_q_occ ~ mooc + gender + post_secondary_edu + country_income_group +
s(age, bs = "ts"), family = binomial(),
```

```
  data = d2)
```

```
summary(gam1) #yes, still significant
```



```

#model gender profile (men vs women across moocs)
d2 <- combined_first_enrolment %>% dplyr::filter(!is.na(gender))

glm2 <- glm(gender ~ mooc, family = binomial(),
            data = d2)
summary(glm2)

d_stim <- data.frame(mooc = (sample(c("2016_07", "2017_03", "2018_05", "2018_10", "2019_05",
"2019_10", "2020_05"), 7, replace = F)))

#to obtain the correct CIs I have predicted using type = "link", giving mean and se on log scales,
calculated CIs and then back-transformed
fit <- predict(glm2, d_stim, type = "link", se.fit = T)
d_stim$emmean <- exp(fit$fit)/(1+exp(fit$fit))
d_stim$lower.CL <- exp(fit$fit-1.96*fit$se.fit)/(1+exp(fit$fit-1.96*fit$se.fit))
d_stim$upper.CL <- exp(fit$fit+1.96*fit$se.fit)/(1+exp(fit$fit+1.96*fit$se.fit))
d_stim
d_stim_p <- d_stim
d_stim_p2 <- d_stim_p %>% dplyr::rename("p" = "emmean")

gg2 <- ggplot(d_stim_p2, aes(x = mooc, y = p)) +
  geom_point() +
  geom_errorbar(aes(ymin=lower.CL, ymax=upper.CL), width = 0.2) +
  labs(title = "", y = "Proportion women", x = "Subsequent MOOC iterations") +
  theme(text=element_text(family="Arial", size = 12),
        axis.title.x=element_text(size = 9.6, colour = "grey30")) +
  theme(axis.text.x=element_blank())
gg2

```

```
#calculate odds ratio
```

```
or_glm(data = d2, model = glm2)
```

```
#does relationship remain significant if you adjust for other demographics which are potential confounders?
```

```
gam2 <- gam(gender ~ mooc + anzsic_div_q_occ + post_secondary_edu + country_income_group +  
s(age, bs = "ts"), family = binomial(),
```

```
data = d2)
```

```
summary(gam2) #only 2017_03 remain significant, and only just! Will not survive Bonferroni.
```

```
#model education profile across mooc iterations
```

```
d2 <- combined_first_enrolment
```

```
glm3 <- glm(post_secondary_edu ~ mooc, family = binomial(),
```

```
data = d2)
```

```
summary(glm3)
```

```
d_stim <- data.frame(mooc = (sample(c("2016_07", "2017_03", "2018_05", "2018_10", "2019_05",  
"2019_10", "2020_05"), 7, replace = F)))
```

```
#to obtain the correct CIs I have predicted using type = "link", giving mean and se on log scales,  
calculated CIs and then back-transformed
```

```
fit <- predict(glm3, d_stim, type = "link", se.fit = T)
```

```
d_stim$emmean <- exp(fit$fit)/(1+exp(fit$fit))
```

```
d_stim$lower.CL <- exp(fit$fit-1.96*fit$se.fit)/(1+exp(fit$fit-1.96*fit$se.fit))
```

```
d_stim$upper.CL <- exp(fit$fit+1.96*fit$se.fit)/(1+exp(fit$fit+1.96*fit$se.fit))
```

```
d_stim
```

```
d_stim_p <- d_stim
```

```
d_stim_p3 <- d_stim_p %>% dplyr::rename("p" = "emmean")
```

```
gg3 <- ggplot(d_stim_p3, aes(x = mooc, y = p)) +
```

```

geom_point() +
geom_errorbar(aes(ymin=lower.CL, ymax=upper.CL), width = 0.2) +
labs(title = "", y = "Proportion post-secondary educated", x = "Subsequent MOOC iterations") +
theme(text=element_text(family="Arial", size = 12),
      axis.title.x=element_text(size = 9.6, colour = "grey30")) +
theme(axis.text.x=element_blank())
gg3

```

```
#calculate odds ratio
```

```
or_glm(data = d2, model = glm3)
```

```
#does relationship remain significant if you adjust for other demographics which are potential
confounders?
```

```
gam3 <- gam(post_secondary_edu ~ mooc + anzsic_div_q_occ + gender + country_income_group +
s(age, bs = "ts"), family = binomial(),
```

```
      data = d2)
```

```
summary(gam3) #yes, still significant
```

```
#model country of origin profile across mooc iterations
```

```
d2 <- combined_first_enrolment
```

```
glm4 <- glm(country_income_group ~ mooc, family = binomial(),
```

```
      data = d2)
```

```
summary(glm4)
```

```
d_stim <- data.frame(mooc = (sample(c("2016_07", "2017_03", "2018_05", "2018_10", "2019_05",
"2019_10", "2020_05"), 7, replace = F)))
```

```
#to obtain the correct CIs I have predicted using type = "link", giving mean and se on log scales,
calculated CIs and then back-transformed
```

```
fit <- predict(glm4, d_stim, type = "link", se.fit = T)
```

```
d_stim$emmean <- exp(fit$fit)/(1+exp(fit$fit))
```

```

d_stim$lower.CL <- exp(fit$fit-1.96*fit$se.fit)/(1+exp(fit$fit-1.96*fit$se.fit))
d_stim$upper.CL <- exp(fit$fit+1.96*fit$se.fit)/(1+exp(fit$fit+1.96*fit$se.fit))

d_stim
d_stim_p <- d_stim
d_stim_p4 <- d_stim_p %>% dplyr::rename("p" = "emmean")

gg4 <- ggplot(d_stim_p4, aes(x = mooc, y = p)) +
  geom_point() +
  geom_errorbar(aes(ymin=lower.CL, ymax=upper.CL), width = 0.2) +
  labs(title = "", y = "Proportion of participants from high income countries", x = "Subsequent MOOC
iterations") +
  theme(axis.text.x=element_blank()) +
  theme(text=element_text(family="Arial", size = 12),
        axis.title.x=element_text(size = 9.6, colour = "grey30"))
gg4

#calculate odds ratio
or_glm(data = d2, model = glm4)

#does relationship remain significant if you adjust for other demographics which are potential
confounders?

gam4 <- gam(country_income_group ~ mooc + anzsic_div_q_occ + gender + post_secondary_edu +
s(age, bs = "ts"), family = binomial(),
  data = d2)

summary(gam4) #2019_05 onwards are significant, others aren't

#model age profile across MOOC iterations
d2 <- combined_first_enrolment %>% dplyr::filter(!is.na(age))

#see how ages changed in the 25th, 50th and 75th quantile
qr1 <- rq(age ~ mooc, data = d2, tau = c(0.25, 0.50, 0.75))

```

```
summary(qr1)
```

```
#graph the mean and se age for each quartile
```

```
recover_data.rq <- emmeans:::recover_data.lm
```

```
emm_basis.rq <- function(object, trms, xlev, grid, se = NULL, ...){
```

```
  m <- model.frame(trms, grid, na.action = na.pass, xlev = xlev)
```

```
  X <- model.matrix(trms, m, contrasts.arg = object$contrasts)
```

```
  bhat <- object$coefficients
```

```
  Xmat <- model.matrix(trms, data = object$model)
```

```
  V = summary(object, se = se, covariance = TRUE)$cov
```

```
  nbasis = matrix(NA)
```

```
  dfargs = list(df = nrow(Xmat) - ncol(Xmat))
```

```
  dffun = function(k, dfargs) dfargs$df
```

```
  list(X = X,
```

```
        bhat = bhat,
```

```
        nbasis = nbasis,
```

```
        V = V,
```

```
        dffun = dffun,
```

```
        dfargs = dfargs)
```

```
}
```

```
qr25 <- rq(age ~ mooc, data = d2, tau = c(0.25))
```

```
em1 <- emmeans(qr25, ~ mooc)
```

```
errors1 <- confint(em1, level = 0.95, type = "response")
```

```
errors1
```

```
plot(em1, horizontal = F) +
```

```
  labs(title = "Age of participants in the lower (25th) quantile", x = "MOOC iteration", y = "Estimated  
quantile")
```

```

qr50 <- rq(age ~ mooc, data = d2, tau = c(0.50))
em2 <- emmeans(qr50, ~ mooc)
errors2 <- confint(em2, level = 0.95, type = "response")
errors2
plot(em2, horizontal = F) +
  labs(title = "Age of participants in the middle (50th) quantile", x = "MOOC iteration", y = "Estimated
quantile")

qr75 <- rq(age ~ mooc, data = d2, tau = c(0.75))
em3 <- emmeans(qr75, ~ mooc)
errors3 <- confint(em3, level = 0.95, type = "response")
errors3
plot(em3, horizontal = F) +
  labs(title = "Age of participants in the upper (75th) quantile", x = "MOOC iteration", y = "Estimated
quantile")

#create a dataframe with the point estimates of the quantiles
a <- errors1 %>% dplyr::select(mooc, emmean, lower.CL, upper.CL) %>% dplyr::mutate(quant =
"25") %>% dplyr::rename(age = emmean)
b <- errors2 %>% dplyr::select(mooc, emmean, lower.CL, upper.CL) %>% dplyr::mutate(quant =
"50") %>% dplyr::rename(age = emmean)
c <- errors3 %>% dplyr::select(mooc, emmean, lower.CL, upper.CL) %>% dplyr::mutate(quant =
"75") %>% dplyr::rename(age = emmean)
quantiles <- bind_rows(a,b,c)

e <- d2 %>% dplyr::group_by(mooc, age) %>% tally()

g1 <- left_join(e, quantiles)
g1a <- sample_n(g1, 20)
g2 <- g1 %>% dplyr::filter(!is.na(quant))

graph_for_paper <- ggplot(g1, aes(x = age, y = n, colour = mooc)) +
  geom_smooth(method = "gam", formula = y ~ s(x, bs = "ts"), size = 0.4) +

```

```
geom_vline(g2, mapping = aes(xintercept = jitter(age, 0.5), linetype = quant, colour = mooc), alpha = 0.8, size = 0.4) +
```

```
theme(text=element_text(family="Arial", size = 12)) +
```

```
labs(title = "") +
```

```
xlim(18,100) +
```

```
ylab("Number of enrolments") +
```

```
xlab("Age") +
```

```
labs(colour = "MOOC iteration\n(year_month)", linetype = "Quantile")
```

```
addSmallLegend <- function(myPlot, pointSize = 0.5, spaceLegend = 0.8) {
```

```
  myPlot +
```

```
    guides(shape = guide_legend(override.aes = list(size = pointSize)),
```

```
           color = guide_legend(override.aes = list(size = pointSize))) +
```

```
    theme(legend.key.size = ggplot2::unit(spaceLegend, "lines"))
```

```
}
```

```
gg5 <- addSmallLegend(graph_for_paper)
```

```
ggsave(file = "Fig1.tiff", plot = gg5, width = 6, height = 2.7, dpi = 300, compression = 'lzw')
```

#does relationship remain significant if you adjust for other demographics which are potential confounders?

```
qr1 <- rq(age ~ mooc + anzsic_div_q_occ + gender + post_secondary_edu + country_income_group,  
data = d2, tau = c(0.25, 0.50, 0.75))
```

```
summary(qr1)
```

#lower and middle quartile significantly lower in 2019\_10 and 2020\_05. A few others only just significant and would not survive Bonferroni

####Create combined plot for catagorical variables

```
gg5 <- ggarrange(gg2, gg3, gg1, gg4,
```

```

labels = c("A", "B", "C", "D"),
font.label = list(size = 12, family = "Ariel"),
ncol = 2, nrow = 2)

gg5
ggsave(gg5, file = "Fig2.tiff", width=7.5, height=8.75, dpi=300, compression = 'lzw')
```

```

Similarly, model all demographics against completion

```

```{r}
load("combined_first_enrolment")

#recode variables for analysis

combined_first_enrolment$gender <- combined_first_enrolment$gender %>% recode("male" = "0",
"female" = "1")

combined_first_enrolment$gender <- na_if(combined_first_enrolment$gender, "other")

combined_first_enrolment$country_income_group <-
combined_first_enrolment$country_income_group %>% recode("High income" = "1", "Lower
middle income" = "0", "Upper middle income" = "0", "Low income" = "0")

combined_first_enrolment$anzsic_div_q_occ <-
as.factor(combined_first_enrolment$anzsic_div_q_occ)

combined_first_enrolment$anzsic_div_q_occ <-
factor(combined_first_enrolment$anzsic_div_q_occ, levels = c("0", "1"))

combined_first_enrolment$post_secondary_edu <-
factor(combined_first_enrolment$post_secondary_edu, levels = c("0", "1"))

#model all demographic variables and completion

d2 <- combined_first_enrolment
d2$mooc <- as.factor(d2$mooc)

qqnorm(d2$age)
qqline(d2$age)

```



```
#age residuals are not normally distributed so smoothed term needed
```

```
#see if fitting a thin plate regression spline does a reasonable job of modeling age
```

```
gam_age <- gam(completed ~ s(age, bs = "tp"), d2, family = binomial())
```

```
p <- data.frame(age = seq(18, 98, by = 5))
```

```
fit <- predict(gam_age, p, type = 'response')
```

```
p <- cbind(p, fit)
```

```
ggplot(p, aes(x = age, y = fit)) +
```

```
  geom_line()
```

```
n <- combined_first_enrolment %>% dplyr::filter(!is.na(age)) %>% dplyr::group_by(age) %>% count()
```

```
n <- n %>% dplyr::rename("nage" = "n")
```

```
d <- combined_first_enrolment %>% dplyr::filter(!is.na(age)) %>% dplyr::group_by(completed,  
age) %>% count()
```

```
d <- left_join(d, n)
```

```
d <- d %>% dplyr::mutate(perc = n/nage)
```

```
ggplot(d, aes(x = age, y = perc)) +
```

```
  geom_point() +
```

```
  facet_wrap(d$completed) +
```

```
  geom_smooth() +
```

```
  xlim(18, 89) #only a few people of each age over 90, so including these distorts trends in graph
```

```
#bs = "tp" seems to do a reasonable job of fitting age data
```

```
#use glms to model each variable separately
```

```
#gender
```

```
glm1 <- glm(completed ~ gender, family = binomial(),
```

```
  data = d2)
```

```
summary(glm1) #not associated
```

```

d_stim <- data.frame(gender = factor(sample(c(0,1), 2, replace = F)))

#to obtain the correct CIs I have predicted using type = "link", giving mean and se on log scales,
calculated CIs and then back-transformed

fit <- predict(glm1, d_stim, type = "link", se.fit = T)

d_stim$emmean <- exp(fit$fit)/(1+exp(fit$fit))

d_stim$lower.CL <- exp(fit$fit-1.96*fit$se.fit)/(1+exp(fit$fit-1.96*fit$se.fit))

d_stim$upper.CL <- exp(fit$fit+1.96*fit$se.fit)/(1+exp(fit$fit+1.96*fit$se.fit))

d_stim

d_stim_p <- d_stim

d_stim_p <- d_stim_p %>% dplyr::rename("p" = "emmean")

gg1 <- ggplot(d_stim_p, aes(x = gender, y = p)) +
  geom_point() +
  geom_errorbar(aes(ymin=lower.CL, ymax=upper.CL), width = 0.2) +
  labs(title = "", y = "Proportion completed") +
  scale_x_discrete(labels = c("Male\n ", "Female\n ")) +
  scale_y_continuous(breaks = c(0.60, 0.62, 0.64, 0.66, 0.68, 0.70), limits = c(0.6, 0.7)) +
  theme(axis.title.x=element_blank()) +
  theme(text = element_text(size = 12, family = "Ariel"))

gg1

#calculate odds ratios

or_glm(data = d2, model = glm1)

#education

glm2 <- glm(completed ~ post_secondary_edu, family = binomial(),
  data = d2)

summary(glm2) #highly associated

d_stim <- data.frame(post_secondary_edu = factor(sample(c(0,1), 2, replace = F)))

#to obtain the correct CIs I have predicted using type = "link", giving mean and se on log scales,
calculated CIs and then back-transformed

```

```

fit <- predict(glm2, d_stim, type = "link", se.fit = T)
d_stim$emmean <- exp(fit$fit)/(1+exp(fit$fit))
d_stim$lower.CL <- exp(fit$fit-1.96*fit$se.fit)/(1+exp(fit$fit-1.96*fit$se.fit))
d_stim$upper.CL <- exp(fit$fit+1.96*fit$se.fit)/(1+exp(fit$fit+1.96*fit$se.fit))
d_stim
d_stim_p <- d_stim
d_stim_p <- d_stim_p %>% dplyr::rename("p" = "emmean")

gg2 <- ggplot(d_stim_p, aes(x = post_secondary_edu, y = p)) +
  geom_point() +
  geom_errorbar(aes(ymin=lower.CL, ymax=upper.CL), width = 0.2) +
  labs(title = "") +
  scale_x_discrete(labels = c("Secondary education\n or less", "Post-secondary\n education")) +
  scale_y_continuous(breaks = c(0.60, 0.62, 0.64, 0.66, 0.68, 0.70), limits = c(0.6, 0.7)) +
  theme(axis.title.x=element_blank(),
        axis.title.y=element_blank()) +
  theme(text = element_text(size = 12, family = "Ariel"))
gg2

#calculate odds ratios
or_glm(data = d2, model = glm2)

#occupation
glm3 <- glm(completed ~ anzsic_div_q_occ, family = binomial(),
           data = d2)
summary(glm3) #associated

d_stim <- data.frame(anzsic_div_q_occ = factor(sample(c(0,1), 2, replace = F)))
#to obtain the correct CIs I have predicted using type = "link", giving mean and se on log scales,
calculated CIs and then back-transformed

```

```

fit <- predict(glm3, d_stim, type = "link", se.fit = T)
d_stim$emmean <- exp(fit$fit)/(1+exp(fit$fit))
d_stim$lower.CL <- exp(fit$fit-1.96*fit$se.fit)/(1+exp(fit$fit-1.96*fit$se.fit))
d_stim$upper.CL <- exp(fit$fit+1.96*fit$se.fit)/(1+exp(fit$fit+1.96*fit$se.fit))
d_stim
d_stim_p <- d_stim
d_stim_p <- d_stim_p %>% dplyr::rename("p" = "emmean")

gg3 <- ggplot(d_stim_p, aes(x = anzsic_div_q_occ, y = p)) +
  geom_point() +
  geom_errorbar(aes(ymin=lower.CL, ymax=upper.CL), width = 0.2) +
  labs(title = "", x = "Participant occupation", y = "Proportion completed") +
  scale_x_discrete(labels = c("Non-health occupation\n ", "Health occupation\n ")) +
  scale_y_continuous(breaks = c(0.60, 0.62, 0.64, 0.66, 0.68, 0.70), limits = c(0.6, 0.7)) +
  theme(axis.title.x=element_blank()) +
  theme(text = element_text(size = 12, family = "Ariel"))
gg3

#calculate odds ratios
or_glm(data = d2, model = glm3)

#country
glm4 <- glm(completed ~ country_income_group, family = binomial(),
  data = d2)
summary(glm4) #highly associated

d_stim <- data.frame(country_income_group = factor(sample(c(0,1), 2, replace = F)))
#to obtain the correct CIs I have predicted using type = "link", giving mean and se on log scales,
calculated CIs and then back-transformed

```

```

fit <- predict(glm4, d_stim, type = "link", se.fit = T)
d_stim$emmean <- exp(fit$fit)/(1+exp(fit$fit))
d_stim$lower.CL <- exp(fit$fit-1.96*fit$se.fit)/(1+exp(fit$fit-1.96*fit$se.fit))
d_stim$upper.CL <- exp(fit$fit+1.96*fit$se.fit)/(1+exp(fit$fit+1.96*fit$se.fit))
d_stim
d_stim_p <- d_stim
d_stim_p <- d_stim_p %>% dplyr::rename("p" = "emmean")

gg4 <- ggplot(d_stim_p, aes(x = country_income_group, y = p)) +
  geom_point() +
  geom_errorbar(aes(ymin=lower.CL, ymax=upper.CL), width = 0.2) +
  labs(title = "", x = "Participant country of residence", y = "Proportion completed") +
  scale_x_discrete(labels = c("Low or middle\n income country", "High\n income country")) +
  scale_y_continuous(breaks = c(0.60, 0.62, 0.64, 0.66, 0.68, 0.70), limits = c(0.6, 0.7)) +
  theme(axis.title.x=element_blank(),
        axis.title.y=element_blank()) +
  theme(text = element_text(size = 12, family = "Ariel"))
gg4

#calculate odds ratios
or_glm(data = d2, model = glm4)

#mooc iteration of enrolment
glm5 <- glm(completed ~ mooc, family = binomial(),
            data = d2)
summary(glm5) #highly associated

d_stim <- data.frame(mooc = (sample(c("2016_07", "2017_03", "2018_05", "2018_10", "2019_05",
"2019_10", "2020_05"), 7, replace = F)))

#to obtain the correct CIs I have predicted using type = "link", giving mean and se on log scales,
calculated CIs and then back-transformed

```

```

fit <- predict(glm5, d_stim, type = "link", se.fit = T)
d_stim$emmean <- exp(fit$fit)/(1+exp(fit$fit))
d_stim$lower.CL <- exp(fit$fit-1.96*fit$se.fit)/(1+exp(fit$fit-1.96*fit$se.fit))
d_stim$upper.CL <- exp(fit$fit+1.96*fit$se.fit)/(1+exp(fit$fit+1.96*fit$se.fit))
d_stim
d_stim_p <- d_stim
d_stim_p <- d_stim_p %>% dplyr::rename("p" = "emmean")

ggplot(d_stim_p, aes(x = mooc, y = p)) +
  geom_point() +
  geom_errorbar(aes(ymin=lower.CL, ymax=upper.CL), width = 0.2) +
  labs(title = "MOOC completion by MOOC iteration of enrolment", x = "MOOC iteration", y =
"Proportion completed")

#calculate odds ratios
or_glm(data = d2, model = glm5)

#age
gam1b <- gam(factor(completed) ~ s(age, bs = "tp"), d2, family = binomial())
b0 <- expand.grid(age = seq(18, 100, length = 20))
fit <- predict(gam1b, b0, se.fit = TRUE)

b0$emmean <- exp(fit$fit)/(1+exp(fit$fit))
b0$lower.CL <- exp(fit$fit-1.96*fit$se.fit)/(1+exp(fit$fit-1.96*fit$se.fit))
b0$upper.CL <- exp(fit$fit+1.96*fit$se.fit)/(1+exp(fit$fit+1.96*fit$se.fit))
b0

age <- ggplot(b0, aes(x = age, y = emmean)) +
  geom_ribbon(aes(ymin = lower.CL, ymax = upper.CL), alpha = .1, colour = NA) +

```

```

geom_line() +
labs(x = "Participant age", y = "Proportion complete") +
theme(text = element_text(size = 12, family = "Ariel")) +
theme(legend.key.size = unit(0.3, 'cm'))
age

ggsave(age, file = "Fig4.tiff", width = 6, height = 2.7, dpi=300, compression = 'lzw')

#From inspection of the graph, trends change at approximately age 35, 61, 74 and 91, so calculate OR
at each of these points
or_gam(data = d2, model = gam1b, pred = "age", values = c(18,35))
or_gam(data = d2, model = gam1b, pred = "age", values = c(35,61))
or_gam(data = d2, model = gam1b, pred = "age", values = c(61,74))
or_gam(data = d2, model = gam1b, pred = "age", values = c(74, 91))
or_gam(data = d2, model = gam1b, pred = "age", values = c(91, 100))

#calculate odds-ratios at 25 year cut-points
or_gam(data = d2, model = gam1b, pred = "age", values = c(25,50))
or_gam(data = d2, model = gam1b, pred = "age", values = c(50,70))
or_gam(data = d2, model = gam1b, pred = "age", values = c(70, 90))

#see what relationships remain significant when you adjust for all confounders
gam1 <- gam(completed ~ s(age, bs = "tp") + mooc + country_income_group + anzsic_div_q_occ +
post_secondary_edu + gender, d2, family = binomial())
summary(gam1) #all relationships remain significant!

####Create combined plot for categorical variables
gg5 <- ggarrange(gg1, gg2, gg3, gg4,
  labels = c("A", "B", "C", "D"),
  font.label = list(size = 12, family = "Ariel"),

```

```
ncol = 2, nrow = 2)
```

```
ggsave(gg5, file = "Fig5.tiff", width=7.5, height=8.75, dpi=300, compression = 'lzw')
```

```
...
```

Plot quiz progression

```
``{r}
```

```
load("combined_first_enrolment")
```

```
d <- combined_first_enrolment
```

```
d$Quiz_A <- d$quiz_1_percent
```

```
d$Quiz_B <- d$quiz_3_percent
```

```
d$Quiz_C <- d$quiz_4_percent
```

```
d <- d %>% dplyr::select(completed, Quiz_A, Quiz_B, Quiz_C, user_id, mooc)
```

```
d1 <- d %>% dplyr::filter(!is.na(Quiz_A))
```

```
d1 <- d1 %>% dplyr::mutate(Quiz_A_attempt = "1")
```

```
d <- left_join(d, d1)
```

```
d1 <- d %>% dplyr::filter(!is.na(Quiz_B))
```

```
d1 <- d1 %>% dplyr::mutate(Quiz_B_attempt = "1")
```

```
d <- left_join(d, d1)
```

```
d1 <- d %>% dplyr::filter(!is.na(Quiz_C))
```

```
d1 <- d1 %>% dplyr::mutate(Quiz_C_attempt = "1")
```

```
d <- left_join(d, d1)
```

#percentage of completers who attempt each quiz

```
d2 <- d %>% dplyr::filter(completed == "0")
```



```

a <- d2 %>% nrow()
b <- d2 %>% dplyr::filter(is.na(Quiz_A_attempt)) %>% nrow()
c <- d2 %>% dplyr::filter(is.na(Quiz_B_attempt)) %>% nrow()
e <- d2 %>% dplyr::filter(is.na(Quiz_C_attempt)) %>% nrow()

```

b/a #66.1% of the people who don't complete the MOOC don't attempt Quiz A

c/a #93.5% of the people who don't complete the MOOC don't attempt Quiz B

e/a #99.7% of the people who don't complete the MOOC don't attempt Quiz C

#graph this!

```

a <- d %>% dplyr::group_by(mooc) %>% count() %>% dplyr::rename(n_enrol = n)
b <- d %>% dplyr::filter(Quiz_A_attempt == "1") %>% dplyr::group_by(mooc) %>% count() %>%
dplyr::rename(n_quiz_a = n)
c <- d %>% dplyr::filter(Quiz_B_attempt == "1") %>% dplyr::group_by(mooc) %>% count() %>%
dplyr::rename(n_quiz_b = n)
e <- d %>% dplyr::filter(Quiz_C_attempt == "1") %>% dplyr::group_by(mooc) %>% count() %>%
dplyr::rename(n_quiz_C = n)
f <- d %>% dplyr::filter(completed == "1") %>% dplyr::group_by(mooc) %>% count() %>%
dplyr::rename(completed = n)

```

```

progression <- left_join(a,b)
progression <- left_join(progression, c)
progression <- left_join(progression, e)
progression <- left_join(progression, f)

```

```

progression_long <- pivot_longer(progression, -mooc, names_to = "mooc_point")

```

```

progression_long$mooc_point <- factor(progression_long$mooc_point, levels = c("n_enrol",
"n_quiz_a", "n_quiz_b", "n_quiz_C", "completed"))

```

```

progression <- ggplot(progression_long, aes(x = mooc_point, y = value, colour = mooc, group =
mooc)) +

```

```

geom_point() +
geom_line() +

labs(title = "Progression through the MOOC", x = "MOOC milestone", y = "Number of participants",
colour = "MOOC iteration (year_month)") +

scale_x_discrete(labels = c("Enrolment", "Quiz A", "Quiz B", "Quiz C", "Completion")) +

theme(text=element_text(family="Arial")) +

theme_set(theme_gray(base_size=10)) +

theme(plot.title = element_text(size = 12)) +

theme(axis.text.y = element_text(size = 10)) +

theme(axis.text.x = element_text(size = 10)) +

theme(legend.title = element_text(size = 10)) +

theme(legend.text = element_text(size = 10))

progression

```

```

ggsave(progression, file = "Fig3.tiff", width = 1500, height = 600, units = "px", dpi=300, compression
= 'lzw')

```

##try a different way of formatting for Plos

#Basic plot with key info

```

progression <- ggplot(progression_long, aes(x = mooc_point, y = value, colour = mooc, group =
mooc)) +

geom_point(size = 0.4) +

geom_line(size = 0.4) +

labs(x = "MOOC milestone", y = "Number of participants", colour = "MOOC
iteration\n(year_month)") +

scale_x_discrete(labels = c("Enrolment", "Quiz A", "Quiz B", "Quiz C", "Completion")) +

theme(text = element_text(size = 12, family = "Ariel")) +

theme(legend.key.size = unit(0.4, 'cm'))

```

```

ggsave(progression, file = "Fig3.tiff", width = 6, height = 2.7, dpi=300, compression = 'lzw')

```

...

## Feedback on the MOOC - general survey summary

```
``{r}
```

```
load("combined_first_completion")
```

```
#count responses to outcome_understanding, strongly agree coded 1 and agree coded 2
```

```
a <- combined_first_completion %>%
```

```
  dplyr::filter(outcome_understanding == "1" | outcome_understanding == "2") %>% nrow()
```

```
b <- combined_first_completion %>%
```

```
  dplyr::filter(!is.na(outcome_understanding)) %>% nrow()
```

```
c <- a/b*100
```

```
c
```

#98% of the 16626 people who completed this question on the feedback survey agreed or strongly agreed that "My understanding of dementia has improved".

```
#count responses to outcome_info_risk_reduction
```

```
a1 <- combined_first_completion %>%
```

```
  dplyr::filter(outcome_info_risk_reduction == "1" | outcome_info_risk_reduction == "2") %>%  
  nrow()
```

```
b1 <- combined_first_completion %>%
```

```
  dplyr::filter(!is.na(outcome_info_risk_reduction)) %>% nrow()
```

```
c1 <- a1/b1*100
```

#95% of the 16587 people who completed this question on the feedback survey agreed or strongly agreed that "The MOOC has given me the information I need to reduce my dementia risk".

```
#count responses to outcome_behaviour_lifestyle
```

```
a2 <- combined_first_completion %>%
```

```
  dplyr::filter(outcome_behaviour_lifestyle == "1" | outcome_behaviour_lifestyle == "2") %>% nrow()
```

```
b2 <- combined_first_completion %>%
```

```
  dplyr::filter(!is.na(outcome_behaviour_lifestyle)) %>% nrow()
```

```
c2 <- a2/b2*100
```

#86% of the 16603 people who completed this question on the feedback survey agreed or strongly agreed that "The MOOC has had an impact on my behaviour and lifestyle choices."

```
#count responses to outcome_already_applied
```

```
a3 <- combined_first_completion %>%
```

```
  dplyr::filter(outcome_already_applied == "1" | outcome_already_applied == "2") %>% nrow()
```

```
b3 <- combined_first_completion %>%
```

```
  dplyr::filter(!is.na(outcome_already_applied)) %>% nrow()
```

```
c3 <- a3/b3*100
```

#73% of the 16593 people who completed this question on the feedback survey agreed or strongly agreed that "I have already applied the knowledge I have gained from the MOOC."

```
#count responses to outcome_recommend
```

```
a4 <- combined_first_completion %>%
```

```
  dplyr::filter(outcome_recommend == "1" | outcome_recommend == "2") %>% nrow()
```

```
b4 <- combined_first_completion %>%
```

```
  dplyr::filter(!is.na(outcome_recommend)) %>% nrow()
```

```
c4 <- a4/b4*100
```

#99% of the 16595 people who completed this question on the feedback survey agreed or strongly agreed that "I would recommend the MOOC to others."

```
#count the number of complete responses to feedback survey
```

```
a5 <- combined_first_completion %>% dplyr::filter(feedback_completed == "1") %>% nrow()
```

```
a5
```

```
b5 <- combined_first_completion %>% dplyr::filter(completed == "1") %>% nrow()
```

```
c5 <- a5/b5*100
```

#57% of users who completed the MOOC attempted the feedback survey

```
#count the number of application Q text responses
```

```
a6 <- combined_first_completion %>% dplyr::filter(!is.na(outcome_already_applied_text)) %>%  
nrow
```

```
b6 <- combined_first_completion %>% dplyr::filter(feedback_completed == "1") %>% nrow()
```

```
c6 <- a6/b6*100
```

#41% of people who attempted the feedback survey provided a response to the text question about knowledge application: 8521 people provided a response

```
#count the number of impression_best text responses
```

```
a7 <- combined_first_completion %>% dplyr::filter(!is.na(impression_best)) %>% nrow
```

```
b7 <- combined_first_completion %>% dplyr::filter(feedback_completed == "1") %>% nrow()
```

```
c7 <- a7/b7*100
```

#59% of people who attempted the feedback survey provided a response to the text question about best features of the MOOC

```
#count the number of impression_worst text responses
```

```
a8 <- combined_first_completion %>% dplyr::filter(!is.na(impression_worst)) %>% nrow
```

```
b8 <- combined_first_completion %>% dplyr::filter(feedback_completed == "1") %>% nrow()
```

```
c8 <- a8/b8*100
```

#51% of people who attempted the feedback survey provided a response to the text question about worst features of the MOOC

```
#tabulate these results
```

```
statement <- c("My understanding of dementia has improved", "The MOOC has given me the information I need to reduce my dementia risk", "The MOOC has had an impact on my behaviour and lifestyle choices", "I have already applied the knowledge I have gained from the MOOC", "I would recommend the MOOC to others")
```

```
percentage <- c(c,c1,c2,c3,c4)
```

```
responses <- c(a,a1,a2,a3,a4)
```

```
tabulate <- data.frame(statement, percentage, responses)
```

```
tabulate$`Feedback survey statement` <- tabulate$statement
```

```
tabulate$`Percentage "agree" or "strongly agree"` <- tabulate$percentage
```

```
tabulate$`Total number of responses` <- tabulate$responses
```

```
tabulate <- tabulate %>% dplyr::select(`Feedback survey statement`, `Percentage "agree" or  
"strongly agree"`, `Total number of responses`)
```

```
tabulate
```

```
write.csv(tabulate, file = "Feedback survey response table.csv")
```

```
...
```

```
###HERE!!!!!!!!!!!!
```

```
From peer review: which demographics are associated with MOOC outcomes
```

```
`{r}
```

```
load("combined_first_completion")
```

```
#recode variables for analysis
```

```
combined_first_completion$outcome_understanding <-  
combined_first_completion$outcome_understanding %>% recode("1" = "1", "2" = "1", "3" = "0", "4"  
= "0", "5" = "0") %>% as.factor()
```

```
combined_first_completion$outcome_info_risk_reduction <-  
combined_first_completion$outcome_info_risk_reduction %>% recode("1" = "1", "2" = "1", "3" =  
"0", "4" = "0", "5" = "0") %>% as.factor()
```

```
combined_first_completion$outcome_behaviour_lifestyle <-  
combined_first_completion$outcome_behaviour_lifestyle %>% recode("1" = "1", "2" = "1", "3" =  
"0", "4" = "0", "5" = "0") %>% as.factor()
```

```
combined_first_completion$outcome_already_applied <-  
combined_first_completion$outcome_already_applied %>% recode("1" = "1", "2" = "1", "3" = "0",  
"4" = "0", "5" = "0") %>% as.factor()
```

```
combined_first_completion$outcome_recommend <-  
combined_first_completion$outcome_recommend %>% recode("1" = "1", "2" = "1", "3" = "0", "4" =  
"0", "5" = "0") %>% as.factor()
```

```
combined_first_completion$learning_satisfied <-  
combined_first_completion$learning_satisfied %>% recode("1" = "1", "2" = "1", "3" = "0", "4" = "0",  
"5" = "0") %>% as.factor()
```

```
combined_first_completion$gender <- combined_first_completion$gender %>% recode("male" =  
"1", "female" = "0")
```

```

combined_first_completion$gender <- na_if(combined_first_completion$gender, "other")
combined_first_completion$gender <- factor(combined_first_completion$gender, levels = c("0",
"1"))
combined_first_completion$country_income_group <-
combined_first_completion$country_income_group %>% recode("High income" = "1", "Lower
middle income" = "0", "Upper middle income" = "0", "Low income" = "0")
combined_first_completion$anzsic_div_q_occ <-
as.factor(combined_first_completion$anzsic_div_q_occ)
combined_first_completion$anzsic_div_q_occ <-
factor(combined_first_completion$anzsic_div_q_occ, levels = c("0", "1"))
combined_first_completion$post_secondary_edu <-
factor(combined_first_completion$post_secondary_edu, levels = c("0", "1"))
combined_first_completion$gender <- factor(combined_first_completion$gender, levels = c("0",
"1"))
combined_first_completion$country_income_group <-
factor(combined_first_completion$country_income_group, levels = c("0", "1"))

```

```
d2 <- combined_first_completion
```

```
qqnorm(d2$age)
```

```
qqline(d2$age)
```

```
#age residuals are not normally distributed so smoothed term needed
```

```
#see if fitting a thin plate regression spline does a reasonable job of modeling age
```

```
gam_age <- gam(outcome_understanding ~ s(age, bs = "tp"), d2, family = binomial())
```

```
p <- data.frame(age = seq(18, 98, by = 5))
```

```
fit <- predict(gam_age, p, type = 'response')
```

```
p <- cbind(p, fit)
```

```
ggplot(p, aes(x = age, y = fit)) +
```

```
  geom_line()
```

```

n <- d2 %>% dplyr::filter(!is.na(age), !is.na(outcome_understanding)) %>%
dplyr::group_by(age) %>% count()

n <- n %>% dplyr::rename("nage" = "n")

d <- d2 %>% dplyr::filter(!is.na(age), !is.na(outcome_understanding)) %>%
dplyr::group_by(outcome_understanding, age) %>% count()

d <- left_join(d, n)

d <- d %>% dplyr::mutate(perc = n/nage)

ggplot(d, aes(x = age, y = perc)) +
  geom_point() +
  facet_wrap(d$outcome_understanding) +
  geom_smooth() +
  xlim(18, 89) #only a few people of each age over 90, so including these distorts trends in graph

```

#bs = "tp" seems to do a reasonable job of fitting age data

#start by seeing if anything is significant in fully adjusted models

```

gam1 <- gam(outcome_understanding ~ s(age, bs = "tp") + country_income_group +
anzsic_div_q_occ + post_secondary_edu + gender, d2, family = binomial())

```

summary(gam1) #age significant: older people more likely to agree "My understanding of dementia prevention has improved"

```

gam2 <- gam(outcome_info_risk_reduction ~ s(age, bs = "tp") + country_income_group +
anzsic_div_q_occ + post_secondary_edu + gender, d2, family = binomial())

```

summary(gam2) #age, gender and country significant: older people and women more likely to agree that "The MOOC has given me the information I need to reduce my dementia risk", people from high income countries are less likely

```

gam3 <- gam(outcome_behaviour_lifestyle ~ s(age, bs = "tp") + country_income_group +
anzsic_div_q_occ + post_secondary_edu + gender, d2, family = binomial())

```

summary(gam3) #age, gender, education, occupation and country significant: older people, women and health workers more likely to agree that "The MOOC has had an impact on my behaviour and lifestyle choices", people with post-secondary education and people from high income countries are less likely



```
gam4 <- gam(outcome_already_applied ~ s(age, bs = "tp") + country_income_group +
anzsic_div_q_occ + post_secondary_edu + gender, d2, family = binomial())
```

summary(gam4) #age, education, occupation and country significant: older people, people with post-secondary education and health workers more likely to agree that "I have already applied the knowledge I have gained from the MOOC", people from high income countries are less likely

```
gam5 <- gam(outcome_recommend ~ s(age, bs = "tp") + country_income_group + anzsic_div_q_occ
+ post_secondary_edu + gender, d2, family = binomial())
```

summary(gam5) #age and country significant: older people and people from high income countries are more likely to agree that "I would recommend the MOOC to others"

```
gam6 <- gam(learning_satisfied ~ s(age, bs = "tp") + country_income_group + anzsic_div_q_occ +
post_secondary_edu + gender, d2, family = binomial())
```

summary(gam6) #occupation and gender significant: women more likely to agree that "I was satisfied with my MOOC learning experience", health workers less likely

#set up repeatable code to model demographics and outcomes

```
individual_demographic_models <- function(d2, outcome, outcome_title) {
```

```
#use glms to model each variable separately
```

```
#gender
```

```
d2$dem <- d2$gender
```

```
glm1 <- glm(outcome ~ dem, family = binomial(),
```

```
data = d2)
```

```
summary(glm1) #not associated
```

```
model <- summary(glm1)
```

```
pa <- model$coefficients[,4] %>% as.data.frame()
```

```
p <- pa[2,1]
```

#look at predicted plots

```

d_stim <- data.frame(dem = factor(sample(c(0,1), 2, replace = F)))
d_stim <- d_stim[order(d_stim$dem),] %>% as.data.frame()
colnames(d_stim) <- "dem"

#to obtain the correct CIs I have predicted using type = "link", giving mean and se on log scales,
#calculated CIs and then back-transformed

fit <- predict(glm1, d_stim, type = "link", se.fit = T)
d_stim$emmean <- exp(fit$fit)/(1+exp(fit$fit))
d_stim$lower.CL <- exp(fit$fit-1.96*fit$se.fit)/(1+exp(fit$fit-1.96*fit$se.fit))
d_stim$upper.CL <- exp(fit$fit+1.96*fit$se.fit)/(1+exp(fit$fit+1.96*fit$se.fit))

d_stim
d_stim_p <- d_stim
d_stim_p <- d_stim_p %>% dplyr::rename("p" = "emmean")

gg1 <- ggplot(d_stim_p, aes(x = dem, y = p)) +
  geom_point() +
  geom_errorbar(aes(ymin=lower.CL, ymax=upper.CL), width = 0.2) +
  labs(title = "MOOC outcome by participant gender (model predictions)", y = "Proportion agreed") +
  scale_x_discrete(labels = c("Female", "Male")) +
  theme(axis.title.x=element_blank())

gg1

#compare to raw data
t1 <- table(d2$outcome, d2$dem)
#proportion who agree
a <- t1[2,1]/(t1[1,1] + t1[2,1]) #women
b <- t1[2,2]/(t1[1,2] + t1[2,2]) #men
d3 <- data.frame(variable = c("dem0", "dem1"), value = c(a,b))

gg2 <- ggplot(d3, aes(x = variable, y = value)) +
  geom_point() +
  labs(title = "MOOC outcome by participant gender (actual)", y = "Proportion agreed") +

```



```
p_value = c(round(p, 5), "reference", ""),
Odds_ratio_confidence_interval = c(or$results[1], "reference", ""))
```

```
#anzsic_div_q_occ
d2$dem <- d2$anzsic_div_q_occ
glm1 <- glm(outcome ~ dem, family = binomial(),
            data = d2)
summary(glm1) #not associated
model <- summary(glm1)
pa <- model$coefficients[,4] %>% as.data.frame()
p <- pa[2,1]

#look at predicted plots
d_stim <- data.frame(dem = factor(sample(c(0,1), 2, replace = F)))
d_stim <- d_stim[order(d_stim$dem),] %>% as.data.frame()
colnames(d_stim) <- "dem"

#to obtain the correct CIs I have predicted using type = "link", giving mean and se on log scales,
calculated CIs and then back-transformed
fit <- predict(glm1, d_stim, type = "link", se.fit = T)
d_stim$emmean <- exp(fit$fit)/(1+exp(fit$fit))
d_stim$lower.CL <- exp(fit$fit-1.96*fit$se.fit)/(1+exp(fit$fit-1.96*fit$se.fit))
d_stim$upper.CL <- exp(fit$fit+1.96*fit$se.fit)/(1+exp(fit$fit+1.96*fit$se.fit))
d_stim
d_stim_p <- d_stim
d_stim_p <- d_stim_p %>% dplyr::rename("p" = "emmean")

gg1 <- ggplot(d_stim_p, aes(x = dem, y = p)) +
  geom_point() +
  geom_errorbar(aes(ymin=lower.CL, ymax=upper.CL), width = 0.2) +
```

```
labs(title = "MOOC outcome by participant occupations (model predictions)", y = "Proportion agreed") +
```

```
scale_x_discrete(labels = c("Other", "Health")) +
```

```
theme(axis.title.x=element_blank())
```

```
gg1
```

```
#compare to raw data
```

```
t1 <- table(d2$outcome, d2$dem)
```

```
#proportion who agree
```

```
a <- t1[2,1]/(t1[1,1] + t1[2,1])
```

```
b <- t1[2,2]/(t1[1,2] + t1[2,2])
```

```
d3 <- data.frame(variable = c("dem0", "dem1"), value = c(a,b))
```

```
gg2 <- ggplot(d3, aes(x = variable, y = value)) +
```

```
geom_point() +
```

```
labs(title = "MOOC outcome by participant occupations (actual)", y = "Proportion agreed") +
```

```
scale_x_discrete(labels = c("other", "Health")) +
```

```
theme(axis.title.x=element_blank())
```

```
gg2
```

```
#calculate odds ratios
```

```
or <- or_glm(data = d2, model = glm1)
```

```
#prepare OR and CI for results table
```

```
or$oddsratio <- or$oddsratio %>% round(2)
```

```
or$`ci_low (2.5)` <- or$`ci_low (2.5)` %>% round(2)
```

```
or$`ci_high (97.5)` <- or$`ci_high (97.5)` %>% round(2)
```

```
or$results <- paste0(or$oddsratio, " (", or$`ci_low (2.5)`, " - ", or$`ci_high (97.5)`, ")")
```

```
#prepare predicted proportions for table
```

```
d_stim_p$p <- d_stim_p$p %>% round(2)
```

```

d_stim_p$lower.CL <- d_stim_p$lower.CL %>% round(2)
d_stim_p$upper.CL <- d_stim_p$upper.CL %>% round(2)
d_stim_p$results <- paste0(d_stim_p$p, " (", d_stim_p$lower.CL, " - ", d_stim_p$upper.CL, ")")

```

```

#build results table section

```

```

results_occupation <- data.frame(Occupation = c("Health Occupation", "Non-health occupation",
"Missing"),

```

```

    Agreed = c(nrow(d2 %>% filter(outcome == 1 & dem == 1)),
              nrow(d2 %>% filter(outcome == 1 & dem == 0)),
              nrow(d2 %>% filter(outcome == 1 & is.na(dem))))),

```

```

    Not_agreed = c(nrow(d2 %>% filter(outcome == 0 & dem == 1)),
                  nrow(d2 %>% filter(outcome == 0 & dem == 0)),
                  nrow(d2 %>% filter(outcome == 0 & is.na(dem))))),

```

```

    Proportion_agreed_confidence_interval = c(d_stim_p$results[2],
d_stim_p$results[1], ""),

```

```

    p_value = c(round(p, 5), "reference", ""),

```

```

    Odds_ratio_confidence_interval = c(or$results[1], "reference", "")
)

```

```

#Education

```

```

d2$dem <- d2$post_secondary_edu

```

```

glm1 <- glm(outcome ~ dem, family = binomial(),
            data = d2)

```

```

summary(glm1) #not associated

```

```

model <- summary(glm1)

```

```

pa <- model$coefficients[,4] %>% as.data.frame()

```

```

p <- pa[2,1]

```

```

#look at predicted plots

```

```

d_stim <- data.frame(dem = factor(sample(c(0,1), 2, replace = F)))
d_stim <- d_stim[order(d_stim$dem),] %>% as.data.frame()
colnames(d_stim) <- "dem"

#to obtain the correct CIs I have predicted using type = "link", giving mean and se on log scales,
#calculated CIs and then back-transformed

fit <- predict(glm1, d_stim, type = "link", se.fit = T)
d_stim$emmean <- exp(fit$fit)/(1+exp(fit$fit))
d_stim$lower.CL <- exp(fit$fit-1.96*fit$se.fit)/(1+exp(fit$fit-1.96*fit$se.fit))
d_stim$upper.CL <- exp(fit$fit+1.96*fit$se.fit)/(1+exp(fit$fit+1.96*fit$se.fit))

d_stim
d_stim_p <- d_stim
d_stim_p <- d_stim_p %>% dplyr::rename("p" = "emmean")

gg1 <- ggplot(d_stim_p, aes(x = dem, y = p)) +
  geom_point() +
  geom_errorbar(aes(ymin=lower.CL, ymax=upper.CL), width = 0.2) +
  labs(title = "MOOC outcome by participant education (model predictions)", y = "Proportion
  agreed") +
  scale_x_discrete(labels = c("Lower edu", "Post-secondary edu")) +
  theme(axis.title.x=element_blank())

gg1

#compare to raw data
t1 <- table(d2$outcome, d2$dem)

#proportion who agree
a <- t1[2,1]/(t1[1,1] + t1[2,1])
b <- t1[2,2]/(t1[1,2] + t1[2,2])

d3 <- data.frame(variable = c("dem0", "dem1"), value = c(a,b))

gg2 <- ggplot(d3, aes(x = variable, y = value)) +
  geom_point() +
  labs(title = "MOOC outcome by participant education (actual)", y = "Proportion agreed") +

```

```

scale_x_discrete(labels = c("Lower edu", "Post-secondary edu")) +
theme(axis.title.x=element_blank())

gg2

#calculate odds ratios
or <- or_glm(data = d2, model = glm1)

#prepare OR and CI for results table
or$oddsratio <- or$oddsratio %>% round(2)
or$`ci_low (2.5)` <- or$`ci_low (2.5)` %>% round(2)
or$`ci_high (97.5)` <- or$`ci_high (97.5)` %>% round(2)
or$results <- paste0(or$oddsratio, " (", or$`ci_low (2.5)`, " - ", or$`ci_high (97.5)`, ")")

#prepare predicted proportions for table
d_stim_p$p <- d_stim_p$p %>% round(2)
d_stim_p$lower.CL <- d_stim_p$lower.CL %>% round(2)
d_stim_p$upper.CL <- d_stim_p$upper.CL %>% round(2)
d_stim_p$results <- paste0(d_stim_p$p, " (", d_stim_p$lower.CL, " - ", d_stim_p$upper.CL, ")")

#build results table section
results_education <- data.frame(Education = c("Post-secondary education", "Lower education level",
"Missing"),
      Agreed = c(nrow(d2 %>% filter(outcome == 1 & dem == 1)),
      nrow(d2 %>% filter(outcome == 1 & dem == 0)),
      nrow(d2 %>% filter(outcome == 1 & is.na(dem)))),
      Not_agreed = c(nrow(d2 %>% filter(outcome == 0 & dem == 1)),
      nrow(d2 %>% filter(outcome == 0 & dem == 0)),
      nrow(d2 %>% filter(outcome == 0 & is.na(dem))),
      Proportion_agreed_confidence_interval = c(d_stim_p$results[2],
d_stim_p$results[1], ""))

```



```

p_value = c(round(p, 5), "reference", ""),
Odds_ratio_confidence_interval = c(or$results[1], "reference", ""))
)

```

```
#Country: high or low income
```

```
d2$dem <- d2$country_income_group
```

```
glm1 <- glm(outcome ~ dem, family = binomial(),
            data = d2)
```

```
summary(glm1) #not associated
```

```
model <- summary(glm1)
```

```
pa <- model$coefficients[,4] %>% as.data.frame()
```

```
p <- pa[2,1]
```

```
#look at predicted plots
```

```
d_stim <- data.frame(dem = factor(sample(c(0,1), 2, replace = F)))
```

```
d_stim <- d_stim[order(d_stim$dem),] %>% as.data.frame()
```

```
colnames(d_stim) <- "dem"
```

```
#to obtain the correct CIs I have predicted using type = "link", giving mean and se on log scales,
calculated CIs and then back-transformed
```

```
fit <- predict(glm1, d_stim, type = "link", se.fit = T)
```

```
d_stim$emmean <- exp(fit$fit)/(1+exp(fit$fit))
```

```
d_stim$lower.CL <- exp(fit$fit-1.96*fit$se.fit)/(1+exp(fit$fit-1.96*fit$se.fit))
```

```
d_stim$upper.CL <- exp(fit$fit+1.96*fit$se.fit)/(1+exp(fit$fit+1.96*fit$se.fit))
```

```
d_stim
```

```
d_stim_p <- d_stim
```

```
d_stim_p <- d_stim_p %>% dplyr::rename("p" = "emmean")
```

```
gg1 <- ggplot(d_stim_p, aes(x = dem, y = p)) +
```

```
  geom_point() +
```

```

geom_errorbar(aes(ymin=lower.CL, ymax=upper.CL), width = 0.2) +
labs(title = "MOOC outcome by participant country (model predictions)", y = "Proportion agreed")
+
scale_x_discrete(labels = c("low income", "high income")) +
theme(axis.title.x=element_blank())
gg1

```

```

#compare to raw data
t1 <- table(d2$outcome, d2$dem)
#proportion who agree
a <- t1[2,1]/(t1[1,1] + t1[2,1])
b <- t1[2,2]/(t1[1,2] + t1[2,2])
d3 <- data.frame(variable = c("dem0", "dem1"), value = c(a,b))

```

```

gg2 <- ggplot(d3, aes(x = variable, y = value)) +
geom_point() +
labs(title = "MOOC outcome by participant country (actual)", y = "Proportion agreed") +
scale_x_discrete(labels = c("low income", "high income")) +
theme(axis.title.x=element_blank())
gg2

```

```

#calculate odds ratios
or <- or_glm(data = d2, model = glm1)

#prepare OR and CI for results table
or$oddsratio <- or$oddsratio %>% round(2)
or$`ci_low (2.5)` <- or$`ci_low (2.5)` %>% round(2)
or$`ci_high (97.5)` <- or$`ci_high (97.5)` %>% round(2)
or$results <- paste0(or$oddsratio, " (", or$`ci_low (2.5)`, " - ", or$`ci_high (97.5)`, ")")

#prepare predicted proportions for table

```

```

d_stim_p$p <- d_stim_p$p %>% round(2)
d_stim_p$lower.CL <- d_stim_p$lower.CL %>% round(2)
d_stim_p$upper.CL <- d_stim_p$upper.CL %>% round(2)
d_stim_p$results <- paste0(d_stim_p$p, " (", d_stim_p$lower.CL, " - ", d_stim_p$upper.CL, ")")

```

```

#build results table section

```

```

results_country <- data.frame(`Country of residence` = c("High income", "Low or middle income",
"Missing"),

```

```

      Agreed = c(nrow(d2 %>% filter(outcome == 1 & dem == 1)),

```

```

        nrow(d2 %>% filter(outcome == 1 & dem == 0)),

```

```

        nrow(d2 %>% filter(outcome == 1 & is.na(dem)))),

```

```

      Not_agreed = c(nrow(d2 %>% filter(outcome == 0 & dem == 1)),

```

```

        nrow(d2 %>% filter(outcome == 0 & dem == 0)),

```

```

        nrow(d2 %>% filter(outcome == 0 & is.na(dem)))),

```

```

      Proportion_agreed_confidence_interval = c(d_stim_p$results[2],
d_stim_p$results[1], ""),

```

```

      p_value = c(round(p, 5), "reference", ""),

```

```

      Odds_ratio_confidence_interval = c(or$results[1], "reference", "")

```

```

    )

```

```

#age

```

```

gam1b <- gam(outcome ~ s(age, bs = "tp"), d2, family = binomial())

```

```

b0 <- expand.grid(age = seq(18, 100, length = 20))

```

```

fit <- predict(gam1b, b0, se.fit = TRUE)

```

```

b0$emmean <- exp(fit$fit)/(1+exp(fit$fit))

```

```

b0$lower.CL <- exp(fit$fit-1.96*fit$se.fit)/(1+exp(fit$fit-1.96*fit$se.fit))

```

```
b0$upper.CL <- exp(fit$fit+1.96*fit$se.fit)/(1+exp(fit$fit+1.96*fit$se.fit))
```

```
b0
```

```
#extract p value for smoothed age
```

```
model <- summary(gam1b)
```

```
p <- model$s.table[,4]
```

```
ageplot <- ggplot(b0, aes(x = age, y = emmean)) +
```

```
  geom_ribbon(aes(ymin = lower.CL, ymax = upper.CL), alpha = .1, colour = NA) +
```

```
  geom_line() +
```

```
  labs(title = "MOOC outcome by participant age", x = "Participant age", y = "Proportion complete")
```

```
ageplot
```

```
#calculate odds-ratios at 25 yeah cut-points
```

```
a <- or_gam(data = d2, model = gam1b, pred = "age", values = c(25,50))
```

```
a$comparison <- paste0(a$value1, " vs ", a$value2)
```

```
a$or <- paste0(round(a$oddsratio, 2), " (", round(a$CI_low (2.5%)\`, 2), " - ", round(a$CI_high  
(97.5%)\`, 2), ")")
```

```
b <- or_gam(data = d2, model = gam1b, pred = "age", values = c(50,70))
```

```
b$comparison <- paste0(b$value1, " vs ", b$value2)
```

```
b$or <- paste0(round(b$oddsratio, 2), " (", round(b$CI_low (2.5%)\`, 2), " - ", round(b$CI_high  
(97.5%)\`, 2), ")")
```

```
c <- or_gam(data = d2, model = gam1b, pred = "age", values = c(70, 90))
```

```
c$comparison <- paste0(c$value1, " vs ", c$value2)
```

```
c$or <- paste0(round(c$oddsratio, 2), " (", round(c$CI_low (2.5%)\`, 2), " - ", round(c$CI_high  
(97.5%)\`, 2), ")")
```

```
#caluclate mean and st dev age for agree, along with %na
```

```
agree <- d2 %>% filter(outcome == "1" )
```

```

mean_agree <- mean(agree$age, na.rm = T)
sd_agree <- sd(agree$age, na.rm = T)
mean_sd_agree <- paste0(round(mean_agree, 2), " (", round(sd_agree, 2), ")")

n_missing_agree <- agree %>% filter(is.na(age)) %>% nrow()
perc_missing_agree <- n_missing_agree/(nrow(agree))*100
missing_agree <- paste0(n_missing_agree, " (", round(perc_missing_agree, 2), "%)")

#caluclate mean and st dev age for not agree, along with %na
disagree <- d2 %>% filter(outcome == "0" )
mean_disagree <- mean(disagree$age, na.rm = T)
sd_disagree <- sd(disagree$age, na.rm = T)
mean_sd_disagree <- paste0(round(mean_disagree, 2), " (", round(sd_disagree, 2), "%)")

n_missing_disagree <- disagree %>% filter(is.na(age)) %>% nrow()
perc_missing_disagree <- n_missing_disagree/(nrow(disagree))*100
missing_disagree <- paste0(n_missing_disagree, " (", round(perc_missing_disagree, 2), "%)")

#build results table section
results_age <- data.frame(`Age` = c("Age", "Mean (standard deviation)", "Missing, n (%)"),
  Agreed = c("", mean_sd_agree, missing_agree),
  Not_agreed = c("", mean_sd_disagree, missing_disagree),
  p_value = c(round(p, 5), "", ""),
  Age_comparison_years = c(a$comparison, b$comparison, c$comparison),
  Odds_ratio_confidence_interval = c(a$or, b$or, c$or))

#save outputs into a new folder
if(!dir.exists(paste0(outcome_title, "_analysis"))){

```

```

dir.create(paste0(outcome_title, "_analysis"))

write.csv(results_gender, file = file.path(getwd(), paste0(outcome_title, "_analysis"),
"results_gender.csv"))

write.csv(results_age, file = file.path(getwd(), paste0(outcome_title, "_analysis"), "results_age.csv"))

write.csv(results_country, file = file.path(getwd(), paste0(outcome_title, "_analysis"),
"results_country.csv"))

write.csv(results_occupation, file = file.path(getwd(), paste0(outcome_title, "_analysis"),
"results_occupation.csv"))

write.csv(results_education, file = file.path(getwd(), paste0(outcome_title, "_analysis"),
"results_education.csv"))

}

###run for each outcome
#assign outcome variable
d2$outcome <- d2$outcome_understanding

#run function
individual_demographic_models(d2 = d2, outcome = outcome, outcome_title =
"outcome_understanding")

#assign outcome variable
d2$outcome <- d2$outcome_info_risk_reduction

#run function
individual_demographic_models(d2 = d2, outcome = outcome, outcome_title =
"outcome_info_risk_reduction")

#assign outcome variable
d2$outcome <- d2$outcome_behaviour_lifestyle

#run function
individual_demographic_models(d2 = d2, outcome = outcome, outcome_title =
"outcome_behaviour_lifestyle")

```

```

#assign outcome variable
d2$outcome <- d2$outcome_already_applied

#run function
individual_demographic_models(d2 = d2, outcome = outcome, outcome_title =
"outcome_already_applied")

#assign outcome variable
d2$outcome <- d2$outcome_recommend

#run function
individual_demographic_models(d2 = d2, outcome = outcome, outcome_title =
"outcome_recommend")

#assign outcome variable
d2$outcome <- d2$learning_satisfied

#run function
individual_demographic_models(d2 = d2, outcome = outcome, outcome_title = "learning_satisfied")

#see what relationships remain significant when you adjust for all confounders
gam1 <- gam(completed ~ s(age, bs = "tp") + mooc + country_income_group + anzsic_div_q_occ +
post_secondary_edu + gender, d2, family = binomial())
summary(gam1) #all relationships remain significant!

####Create combined plot for categorical variables
gg5 <- ggarrange(gg1, gg2, gg3, gg4,
  labels = c("A", "B", "C", "D"),
  ncol = 2, nrow = 2)
#####

#use glms to mdoel each variable seperately
#gender

```

```

glm1 <- glm(completed ~ gender, family = binomial(),
            data = d2)
summary(glm1) #not associated

d_stim <- data.frame(gender = factor(sample(c(0,1), 2, replace = F)))
#to obtain the correct CIs I have predicted using type = "link", giving mean and se on log scales,
#calculated CIs and then back-transformed
fit <- predict(glm1, d_stim, type = "link", se.fit = T)
d_stim$emmean <- exp(fit$fit)/(1+exp(fit$fit))
d_stim$lower.CL <- exp(fit$fit-1.96*fit$se.fit)/(1+exp(fit$fit-1.96*fit$se.fit))
d_stim$upper.CL <- exp(fit$fit+1.96*fit$se.fit)/(1+exp(fit$fit+1.96*fit$se.fit))
d_stim
d_stim_p <- d_stim
d_stim_p <- d_stim_p %>% dplyr::rename("p" = "emmean")

gg1 <- ggplot(d_stim_p, aes(x = gender, y = p)) +
  geom_point() +
  geom_errorbar(aes(ymin=lower.CL, ymax=upper.CL), width = 0.2) +
  labs(title = "MOOC completion by participant gender", y = "Proportion completed") +
  scale_x_discrete(labels = c("Male", "Female")) +
  scale_y_continuous(breaks = c(0.60, 0.62, 0.64, 0.66, 0.68, 0.70), limits = c(0.6, 0.7)) +
  theme(axis.title.x=element_blank())
gg1

#calculate odds ratios
or <- or_glm(data = d2, model = glm1)

#prepare OR and CI for results table
or$oddsratio <- or$oddsratio %>% round(2)
or$`ci_low (2.5)` <- or$`ci_low (2.5)` %>% round(2)
or$`ci_high (97.5)` <- or$`ci_high (97.5)` %>% round(2)

```



```

or$results <- paste0(or$oddsratio, " (", or$`ci_low` (2.5)`, " - ", or$`ci_high` (97.5)`, ")")

#build results table section
results_gender <- data.frame(Gender = c("Male, Female", "Missing"),
                             Agree = c())

#education
glm2 <- glm(completed ~ post_secondary_edu, family = binomial(),
            data = d2)
summary(glm2) #highly associated

d_stim <- data.frame(post_secondary_edu = factor(sample(c(0,1), 2, replace = F)))

#to obtain the correct CIs I have predicted using type = "link", giving mean and se on log scales,
#calculated CIs and then back-transformed
fit <- predict(glm2, d_stim, type = "link", se.fit = T)
d_stim$emmean <- exp(fit$fit)/(1+exp(fit$fit))
d_stim$lower.CL <- exp(fit$fit-1.96*fit$se.fit)/(1+exp(fit$fit-1.96*fit$se.fit))
d_stim$upper.CL <- exp(fit$fit+1.96*fit$se.fit)/(1+exp(fit$fit+1.96*fit$se.fit))
d_stim
d_stim_p <- d_stim
d_stim_p <- d_stim_p %>% dplyr::rename("p" = "emmean")

gg2 <- ggplot(d_stim_p, aes(x = post_secondary_edu, y = p)) +
  geom_point() +
  geom_errorbar(aes(ymin=lower.CL, ymax=upper.CL), width = 0.2) +
  labs(title = "MOOC completion by participant education level") +
  scale_x_discrete(labels = c("Secondary education or less", "Post-secondary education")) +
  scale_y_continuous(breaks = c(0.60, 0.62, 0.64, 0.66, 0.68, 0.70), limits = c(0.6, 0.7)) +
  theme(axis.title.x=element_blank(),
        axis.title.y=element_blank())
gg2

```

```
#calculate odds ratios
```

```
or_glm(data = d2, model = glm2)
```

```
#occupation
```

```
glm3 <- glm(completed ~ anzsic_div_q_occ, family = binomial(),
```

```
data = d2)
```

```
summary(glm3) #associated
```

```
d_stim <- data.frame(anzsic_div_q_occ = factor(sample(c(0,1), 2, replace = F)))
```

```
#to obtain the correct CIs I have predicted using type = "link", giving mean and se on log scales,  
calculated CIs and then back-transformed
```

```
fit <- predict(glm3, d_stim, type = "link", se.fit = T)
```

```
d_stim$emmean <- exp(fit$fit)/(1+exp(fit$fit))
```

```
d_stim$lower.CL <- exp(fit$fit-1.96*fit$se.fit)/(1+exp(fit$fit-1.96*fit$se.fit))
```

```
d_stim$upper.CL <- exp(fit$fit+1.96*fit$se.fit)/(1+exp(fit$fit+1.96*fit$se.fit))
```

```
d_stim
```

```
d_stim_p <- d_stim
```

```
d_stim_p <- d_stim_p %>% dplyr::rename("p" = "emmean")
```

```
gg3 <- ggplot(d_stim_p, aes(x = anzsic_div_q_occ, y = p)) +
```

```
geom_point() +
```

```
geom_errorbar(aes(ymin=lower.CL, ymax=upper.CL), width = 0.2) +
```

```
labs(title = "MOOC completion by participant occupation", x = "Participant occupation", y =  
"Proportion completed") +
```

```
scale_x_discrete(labels = c("Non-health occupation", "Health occupation")) +
```

```
scale_y_continuous(breaks = c(0.60, 0.62, 0.64, 0.66, 0.68, 0.70), limits = c(0.6, 0.7)) +
```

```
theme(axis.title.x=element_blank())
```

```
gg3
```

```
#calculate odds ratios
```

```
or_glm(data = d2, model = glm3)
```

```
#country
```

```
glm4 <- glm(completed ~ country_income_group, family = binomial(),  
            data = d2)
```

```
summary(glm4) #highly associated
```

```
d_stim <- data.frame(country_income_group = factor(sample(c(0,1), 2, replace = F)))
```

```
#to obtain the correct CIs I have predicted using type = "link", giving mean and se on log scales,  
calculated CIs and then back-transformed
```

```
fit <- predict(glm4, d_stim, type = "link", se.fit = T)
```

```
d_stim$emmean <- exp(fit$fit)/(1+exp(fit$fit))
```

```
d_stim$lower.CL <- exp(fit$fit-1.96*fit$se.fit)/(1+exp(fit$fit-1.96*fit$se.fit))
```

```
d_stim$upper.CL <- exp(fit$fit+1.96*fit$se.fit)/(1+exp(fit$fit+1.96*fit$se.fit))
```

```
d_stim
```

```
d_stim_p <- d_stim
```

```
d_stim_p <- d_stim_p %>% dplyr::rename("p" = "emmean")
```

```
gg4 <- ggplot(d_stim_p, aes(x = country_income_group, y = p)) +
```

```
  geom_point() +
```

```
  geom_errorbar(aes(ymin=lower.CL, ymax=upper.CL), width = 0.2) +
```

```
  labs(title = "MOOC completion by participant country of residence wealth", x = "Participant country  
of residence", y = "Proportion completed") +
```

```
  scale_x_discrete(labels = c("Low or middle income country", "High income country")) +
```

```
  scale_y_continuous(breaks = c(0.60, 0.62, 0.64, 0.66, 0.68, 0.70), limits = c(0.6, 0.7)) +
```

```
  theme(axis.title.x=element_blank(),
```

```
        axis.title.y=element_blank())
```

```
gg4
```

```
#calculate odds ratios
```

```

or_glm(data = d2, model = glm4)

#mooc iteration of enrolment
glm5 <- glm(completed ~ mooc, family = binomial(),
            data = d2)
summary(glm5) #highly associated

d_stim <- data.frame(mooc = (sample(c("2016_07", "2017_03", "2018_05", "2018_10", "2019_05",
"2019_10", "2020_05"), 7, replace = F)))

#to obtain the correct CIs I have predicted using type = "link", giving mean and se on log scales,
calculated CIs and then back-transformed
fit <- predict(glm5, d_stim, type = "link", se.fit = T)
d_stim$emmean <- exp(fit$fit)/(1+exp(fit$fit))
d_stim$lower.CL <- exp(fit$fit-1.96*fit$se.fit)/(1+exp(fit$fit-1.96*fit$se.fit))
d_stim$upper.CL <- exp(fit$fit+1.96*fit$se.fit)/(1+exp(fit$fit+1.96*fit$se.fit))
d_stim
d_stim_p <- d_stim
d_stim_p <- d_stim_p %>% dplyr::rename("p" = "emmean")

ggplot(d_stim_p, aes(x = mooc, y = p)) +
  geom_point() +
  geom_errorbar(aes(ymin=lower.CL, ymax=upper.CL), width = 0.2) +
  labs(title = "MOOC completion by MOOC iteration of enrolment", x = "MOOC iteration", y =
"Proportion completed")

#calculate odds ratios
or_glm(data = d2, model = glm5)

#age

```

```
gam1b <- gam(factor(completed) ~ s(age, bs = "tp"), d2, family = binomial())
b0 <- expand.grid(age = seq(18, 100, length = 20))
fit <- predict(gam1b, b0, se.fit = TRUE)
```

```
b0$emmean <- exp(fit$fit)/(1+exp(fit$fit))
b0$lower.CL <- exp(fit$fit-1.96*fit$se.fit)/(1+exp(fit$fit-1.96*fit$se.fit))
b0$upper.CL <- exp(fit$fit+1.96*fit$se.fit)/(1+exp(fit$fit+1.96*fit$se.fit))
b0
```

```
age <- ggplot(b0, aes(x = age, y = emmean)) +
  geom_ribbon(aes(ymin = lower.CL, ymax = upper.CL), alpha = .1, colour = NA) +
  geom_line() +
  labs(title = "MOOC completion by participant age", x = "Participant age", y = "Proportion
complete")
age
```

```
ggsave(file = "age.png", plot = age, device = png(), width = 8, height = 4)
```

#From inspection of the graph, trends change at approximately age 35, 61, 74 and 91, so calculate OR at each of these points

```
or_gam(data = d2, model = gam1b, pred = "age", values = c(18,35))
or_gam(data = d2, model = gam1b, pred = "age", values = c(35,61))
or_gam(data = d2, model = gam1b, pred = "age", values = c(61,74))
or_gam(data = d2, model = gam1b, pred = "age", values = c(74, 91))
or_gam(data = d2, model = gam1b, pred = "age", values = c(91, 100))
```

#calculate odds-ratios at 25 year cut-points

```
or_gam(data = d2, model = gam1b, pred = "age", values = c(25,50))
or_gam(data = d2, model = gam1b, pred = "age", values = c(50,70))
or_gam(data = d2, model = gam1b, pred = "age", values = c(70, 90))
```

```
#see what relationships remain significant when you adjust for all confounders

gam1 <- gam(completed ~ s(age, bs = "tp") + mooc + country_income_group + anzsic_div_q_occ +
post_secondary_edu + gender, d2, family = binomial())

summary(gam1) #all relationships remain significant!
```

```
####Create combined plot for categorical variables
```

```
gg5 <- ggarrange(gg1, gg2, gg3, gg4,
  labels = c("A", "B", "C", "D"),
  ncol = 2, nrow = 2)
```

```
ggsave(gg5, file = "Fig5.tiff", width=11, height=9, dpi=300, compression = 'lzw')
```

```
...
```

```
Summary stats and models for interest and experience variables
```

```
``{r}
```

```
load("combined_first_enrolment")
```

```
#recode variables for analysis
```

```
combined_first_enrolment$gender <- combined_first_enrolment$gender %>% recode("male" = "0",
"female" = "1")
```

```
combined_first_enrolment$gender <- na_if(combined_first_enrolment$gender, "other")
```

```
combined_first_enrolment$gender <- factor(combined_first_enrolment$gender, levels = c("0", "1"))
```

```
combined_first_enrolment$post_secondary_edu <-
factor(combined_first_enrolment$post_secondary_edu, levels = c("0", "1"))
```

```
combined_first_enrolment$country_income_group <-
combined_first_enrolment$country_income_group %>% recode("High income" = "1", "Lower
middle income" = "0", "Upper middle income" = "0", "Low income" = "0")
```

```
combined_first_enrolment$anzsic_div_q_occ <-  
factor(combined_first_enrolment$anzsic_div_q_occ, levels = c("0", "1"))
```

```
d <- combined_first_enrolment %>% dplyr::select(user_id, mooc, completed, experience_family,  
interest_decline, interest_dementia, interest_diagnosis, interest_improve, interest_inherit,  
interest_reduce_risk, interest_worry, age, gender, post_secondary_edu, country_income_group,  
anzsic_div_q_occ)
```

```
d$completed <- as.factor(d$completed)
```

```
d %>% dplyr::group_by(mooc, experience_family) %>% count() #! wasn't given any experience info in  
the 2020 data, but we have for all other years
```

```
d %>% dplyr::group_by(mooc, interest_decline) %>% count() #not asked in 2017
```

```
d %>% dplyr::group_by(mooc, interest_dementia) %>% count() #not asked in 2017
```

```
d %>% dplyr::group_by(mooc, interest_diagnosis) %>% count() #not asked in 2017
```

```
d %>% dplyr::group_by(mooc, interest_improve) %>% count() #not asked in 2017
```

```
d %>% dplyr::group_by(mooc, interest_inherit) %>% count() #not asked in 2017
```

```
d %>% dplyr::group_by(mooc, interest_reduce_risk) %>% count() #not asked in 2017
```

```
d %>% dplyr::group_by(mooc, interest_worry) %>% count() #not asked in 2017
```

```
#remove 2020 from experience_family data
```

```
d1 <- d %>% dplyr::filter(mooc != "2020_05")
```

```
#graph experience_family
```

```
ggplot(d1, aes(x = experience_family, fill = completed)) +  
  geom_bar(position = "dodge")
```

```
#experience family does not look to be related to completion - test this with a glm
```

```
d1$experience_family <- d1$experience_family %>% replace_na("0")
```

```
m1 <- glm(completed ~ experience_family, d1, family = "binomial")
```

```
summary(m1) #relationship is significant
```

```
d_stim <- data.frame(experience_family = factor(sample(c(0,1), 2, replace = F)))
```

```

#to obtain the correct CIs I have predicted using type = "link", giving mean and se on log scales,
calculated CIs and then back-transformed

fit <- predict(m1, d_stim, type = "link", se.fit = T)
d_stim$emmean <- exp(fit$fit)/(1+exp(fit$fit))
d_stim$lower.CL <- exp(fit$fit-1.96*fit$se.fit)/(1+exp(fit$fit-1.96*fit$se.fit))
d_stim$upper.CL <- exp(fit$fit+1.96*fit$se.fit)/(1+exp(fit$fit+1.96*fit$se.fit))

d_stim
d_stim_p <- d_stim
d_stim_p <- d_stim_p %>% dplyr::rename("p" = "emmean")

ggplot(d_stim_p, aes(x = experience_family, y = p)) +
  geom_point() +
  geom_errorbar(aes(ymin=lower.CL, ymax=upper.CL), width = 0.2) +
  labs(title = "MOOC completion by participants' family experience with dementia", x = "Participant
family experience with dementia", y = "Proportion completed") +
  scale_x_discrete(labels = c("No family experience sepcified", "Family experience specified"))

#calculate odds ratios
or_glm(data = d1, model = m1)

#see if this is still significant after adjusting for confounders
m1a <- gam(completed ~ experience_family + mooc + s(age, bs = "tp") + gender +
post_secondary_edu + country_income_group + anzsic_div_q_occ, d1, family = "binomial")
summary(m1a) #relationship remains not significant after adjusting for confounders

#remove 2017 from interest data
d2 <- d %>% dplyr::filter(mooc != "2017_03")

#graph interest categories

```



```

d3 <- d2 %>% pivot_longer(c(interest_decline, interest_dementia, interest_diagnosis,
interest_improve, interest_inherit, interest_reduce_risk, interest_worry), names_to =
"interest_cat")

d3$value <- d3$value %>% replace_na("0")

ggplot(d3, aes(x = interest_cat, fill = value)) +
  geom_bar(position = "dodge") +
  facet_wrap(d3$completed) #doesn't look to be any associations

#test this statistically, adjusting for MOOC iteration of enrolment

d4 <- d3 %>% pivot_wider(names_from = interest_cat, values_from = value)

m2 <- glm(completed ~ interest_decline + interest_dementia + interest_diagnosis +
interest_improve + interest_inherit + interest_reduce_risk + interest_worry + mooc, d4, family =
"binomial")

summary(m2) #wow - interest_decline, interest_diagnosis, interest_improve, interest_inherit,
interest_reduce_risk, interest_worry are all associated (to varying degrees, in varying directions)
with completion

#adjust this model for other demographic factors that are associated with completion

m3 <- gam(completed ~ interest_decline + interest_dementia + interest_diagnosis +
interest_improve + interest_inherit + interest_reduce_risk + interest_worry + mooc + s(age, bs =
"tp") + gender + post_secondary_edu + country_income_group + anzsic_div_q_occ, d4, family =
"binomial")

summary(m3)

#interest decline, diagnosis, improve and reduce risk still associated with completion

#what if you model each of these individually, so they don't cover the effects of each other?

#interest_decline

glm3a <- glm(completed ~ interest_decline, d4, family = "binomial")

summary(glm3a)

d_stim <- data.frame(interest_decline = factor(sample(c(0,1), 2, replace = F)))

#to obtain the correct CIs I have predicted using type = "link", giving mean and se on log scales,
calculated CIs and then back-transformed

```

```

fit <- predict(glm3a, d_stim, type = "link", se.fit = T)
d_stim$emmean <- exp(fit$fit)/(1+exp(fit$fit))
d_stim$lower.CL <- exp(fit$fit-1.96*fit$se.fit)/(1+exp(fit$fit-1.96*fit$se.fit))
d_stim$upper.CL <- exp(fit$fit+1.96*fit$se.fit)/(1+exp(fit$fit+1.96*fit$se.fit))
d_stim
d_stim_p <- d_stim
d_stim_p <- d_stim_p %>% dplyr::rename("p" = "emmean")

ggplot(d_stim_p, aes(x = interest_decline, y = p)) +
  geom_point() +
  geom_errorbar(aes(ymin=lower.CL, ymax=upper.CL), width = 0.2) +
  labs(title = "MOOC completion by participants reasons for participating", x = "I feel my memory or
other thinking skills are getting worse", y = "Proportion completed") +
  scale_x_discrete(labels = c("Affirmative", "Not affirmative"))

#calculate odds ratios
or_glm(data = d4, model = glm3a)

m3a <- gam(completed ~ interest_decline + mooc + s(age, bs = "tp") + gender +
post_secondary_edu + country_income_group + anzsic_div_q_occ, d4, family = "binomial")
summary(m3a)

#significant negative association

#interest_dementia
glm3b <- glm(completed ~ interest_dementia, d4, family = "binomial")
summary(glm3b)

d_stim <- data.frame(interest_dementia = factor(sample(c(0,1), 2, replace = F)))
#to obtain the correct CIs I have predicted using type = "link", giving mean and se on log scales,
calculated CIs and then back-transformed
fit <- predict(glm3b, d_stim, type = "link", se.fit = T)

```

```

d_stim$emmean <- exp(fit$fit)/(1+exp(fit$fit))
d_stim$lower.CL <- exp(fit$fit-1.96*fit$se.fit)/(1+exp(fit$fit-1.96*fit$se.fit))
d_stim$upper.CL <- exp(fit$fit+1.96*fit$se.fit)/(1+exp(fit$fit+1.96*fit$se.fit))

d_stim
d_stim_p <- d_stim
d_stim_p <- d_stim_p %>% dplyr::rename("p" = "emmean")

ggplot(d_stim_p, aes(x = interest_dementia, y = p)) +
  geom_point() +
  geom_errorbar(aes(ymin=lower.CL, ymax=upper.CL), width = 0.2) +
  labs(title = "MOOC completion by participants reasons for participating", x = "I think I may be
getting dementia", y = "Proportion completed") +
  scale_x_discrete(labels = c("Affirmative", "Not affirmative"))

#calculate odds ratios
or_glm(data = d4, model = glm3b)

m3b <- gam(completed ~ interest_dementia + mooc + s(age, bs = "tp") + gender +
post_secondary_edu + country_income_group + anzsic_div_q_occ, d4, family = "binomial")
summary(m3b)
#significant negative association, but would not survive Bonferroni

#interest_diagnosis
glm3c <- glm(completed ~ interest_diagnosis, d4, family = "binomial")
summary(glm3c)

d_stim <- data.frame(interest_diagnosis = factor(sample(c(0,1), 2, replace = F)))
#to obtain the correct CIs I have predicted using type = "link", giving mean and se on log scales,
calculated CIs and then back-transformed
fit <- predict(glm3c, d_stim, type = "link", se.fit = T)
d_stim$emmean <- exp(fit$fit)/(1+exp(fit$fit))

```

```

d_stim$lower.CL <- exp(fit$fit-1.96*fit$se.fit)/(1+exp(fit$fit-1.96*fit$se.fit))
d_stim$upper.CL <- exp(fit$fit+1.96*fit$se.fit)/(1+exp(fit$fit+1.96*fit$se.fit))

d_stim
d_stim_p <- d_stim
d_stim_p <- d_stim_p %>% dplyr::rename("p" = "emmean")

ggplot(d_stim_p, aes(x = interest_diagnosis, y = p)) +
  geom_point() +
  geom_errorbar(aes(ymin=lower.CL, ymax=upper.CL), width = 0.2) +
  labs(title = "MOOC completion by participants reasons for participating", x = "I want information to
take to my doctor", y = "Proportion completed") +
  scale_x_discrete(labels = c("Affirmative", "Not affirmative"))

#calculate odds ratios
or_glm(data = d4, model = glm3c)

m3c <- gam(completed ~ interest_diagnosis + mooc + s(age, bs = "tp") + gender +
post_secondary_edu + country_income_group + anzsic_div_q_occ, d4, family = "binomial")
summary(m3c)

#no association

#interest_improve
glm3d <- glm(completed ~ interest_improve, d4, family = "binomial")
summary(glm3d)

d_stim <- data.frame(interest_improve = factor(sample(c(0,1), 2, replace = F)))
#to obtain the correct CIs I have predicted using type = "link", giving mean and se on log scales,
calculated CIs and then back-transformed
fit <- predict(glm3d, d_stim, type = "link", se.fit = T)
d_stim$emmean <- exp(fit$fit)/(1+exp(fit$fit))

```

```

d_stim$lower.CL <- exp(fit$fit-1.96*fit$se.fit)/(1+exp(fit$fit-1.96*fit$se.fit))
d_stim$upper.CL <- exp(fit$fit+1.96*fit$se.fit)/(1+exp(fit$fit+1.96*fit$se.fit))

d_stim
d_stim_p <- d_stim
d_stim_p <- d_stim_p %>% dplyr::rename("p" = "emmean")

ggplot(d_stim_p, aes(x = interest_improve, y = p)) +
  geom_point() +
  geom_errorbar(aes(ymin=lower.CL, ymax=upper.CL), width = 0.2) +
  labs(title = "MOOC completion by participants reasons for participating", x = "I want to improve my
memory or thinking skills", y = "Proportion completed") +
  scale_x_discrete(labels = c("Affirmative", "Not affirmative"))

#calculate odds ratios
or_glm(data = d4, model = glm3d)

m3d <- gam(completed ~ interest_improve + mooc + s(age, bs = "tp") + gender +
post_secondary_edu + country_income_group + anzsic_div_q_occ, d4, family = "binomial")
summary(m3d)

#singificant positive association

#interest_inherit
glm3e <- glm(completed ~ interest_inherit, d4, family = "binomial")
summary(glm3e)

d_stim <- data.frame(interest_inherit = factor(sample(c(0,1), 2, replace = F)))

#to obtain the correct CIs I have predicted using type = "link", giving mean and se on log scales,
calculated CIs and then back-transformed
fit <- predict(glm3e, d_stim, type = "link", se.fit = T)
d_stim$emmean <- exp(fit$fit)/(1+exp(fit$fit))
d_stim$lower.CL <- exp(fit$fit-1.96*fit$se.fit)/(1+exp(fit$fit-1.96*fit$se.fit))

```

```

d_stim$upper.CL <- exp(fit$fit+1.96*fit$se.fit)/(1+exp(fit$fit+1.96*fit$se.fit))
d_stim
d_stim_p <- d_stim
d_stim_p <- d_stim_p %>% dplyr::rename("p" = "emmean")

ggplot(d_stim_p, aes(x = interest_inherit, y = p)) +
  geom_point() +
  geom_errorbar(aes(ymin=lower.CL, ymax=upper.CL), width = 0.2) +
  labs(title = "MOOC completion by participants reasons for participating", x = "I think I may inherit
dementia from my parent or grandparent", y = "Proportion completed") +
  scale_x_discrete(labels = c("Affirmative", "Not affirmative"))

#calculate odds ratios
or_glm(data = d4, model = glm3e)

m3e <- gam(completed ~ interest_inherit + mooc + s(age, bs = "tp") + gender + post_secondary_edu
+ country_income_group + anzsic_div_q_occ, d4, family = "binomial")
summary(m3e)

#no association

#interest_reduce_risk
glm3f <- glm(completed ~ interest_reduce_risk, d4, family = "binomial")
summary(glm3f)

d_stim <- data.frame(interest_reduce_risk = factor(sample(c(0,1), 2, replace = F)))

#to obtain the correct CIs I have predicted using type = "link", giving mean and se on log scales,
calculated CIs and then back-transformed
fit <- predict(glm3f, d_stim, type = "link", se.fit = T)
d_stim$emmean <- exp(fit$fit)/(1+exp(fit$fit))
d_stim$lower.CL <- exp(fit$fit-1.96*fit$se.fit)/(1+exp(fit$fit-1.96*fit$se.fit))

```

```

d_stim$upper.CL <- exp(fit$fit+1.96*fit$se.fit)/(1+exp(fit$fit+1.96*fit$se.fit))
d_stim
d_stim_p <- d_stim
d_stim_p <- d_stim_p %>% dplyr::rename("p" = "emmean")

ggplot(d_stim_p, aes(x = interest_reduce_risk, y = p)) +
  geom_point() +
  geom_errorbar(aes(ymin=lower.CL, ymax=upper.CL), width = 0.2) +
  labs(title = "MOOC completion by participants reasons for participating", x = "I want to reduce my
risk of dementia", y = "Proportion completed") +
  scale_x_discrete(labels = c("Affirmative", "Not affirmative"))

#calculate odds ratios
or_glm(data = d4, model = glm3f)

m3f <- gam(completed ~ interest_reduce_risk + mooc + s(age, bs = "tp") + gender +
post_secondary_edu + country_income_group + anzsic_div_q_occ, d4, family = "binomial")
summary(m3f)

#significant positive association

#interest_worry
glm3g <- glm(completed ~ interest_worry, d4, family = "binomial")
summary(glm3g)

d_stim <- data.frame(interest_worry = factor(sample(c(0,1), 2, replace = F)))

#to obtain the correct CIs I have predicted using type = "link", giving mean and se on log scales,
calculated CIs and then back-transformed
fit <- predict(glm3g, d_stim, type = "link", se.fit = T)
d_stim$emmean <- exp(fit$fit)/(1+exp(fit$fit))
d_stim$lower.CL <- exp(fit$fit-1.96*fit$se.fit)/(1+exp(fit$fit-1.96*fit$se.fit))

```

```

d_stim$upper.CL <- exp(fit$fit+1.96*fit$se.fit)/(1+exp(fit$fit+1.96*fit$se.fit))
d_stim
d_stim_p <- d_stim
d_stim_p <- d_stim_p %>% dplyr::rename("p" = "emmean")

ggplot(d_stim_p, aes(x = interest_worry, y = p)) +
  geom_point() +
  geom_errorbar(aes(ymin=lower.CL, ymax=upper.CL), width = 0.2) +
  labs(title = "MOOC completion by participants reasons for participating", x = "I worry about my
chances of getting dementia", y = "Proportion completed") +
  scale_x_discrete(labels = c("Affirmative", "Not affirmative"))

#calculate odds ratios
or_glm(data = d4, model = glm3g)

m3g <- gam(completed ~ interest_worry + mooc + s(age, bs = "tp") + gender + post_secondary_edu
+ country_income_group + anzsic_div_q_occ, d4, family = "binomial")
summary(m3g)
#no association

#see if there's a relationship between interest_inherit and experience_family
ggplot(d, aes(x = interest_inherit, fill = experience_family)) +
  geom_bar(position = "dodge")
d5 <- d
d5$experience_family <- d5$experience_family %>% replace_na("0") %>% as.factor()
d5$interest_inherit <- d5$interest_inherit %>% replace_na("0") %>% as.factor()
d5 <- d5 %>% na_if("not_asked")
m4 <- glm(interest_inherit ~ experience_family, d5, family = "binomial")
summary(m4) #family experience is associated with interest_inherit

#tabule interest data

```



```

d4$interest_decline <- factor(d4$interest_decline,
                             levels = c("1", "0"),
                             labels = c("I feel my memory or other thinking skills are getting worse", "0"))
d4$interest_dementia <- factor(d4$interest_dementia,
                               levels = c("1", "0"),
                               labels = c("I think I may be getting dementia", "0"))
d4$interest_diagnosis <- factor(d4$interest_diagnosis,
                                levels = c("1", "0"),
                                labels = c("I want information to take to my doctor", "0"))
d4$interest_improve <- factor(d4$interest_improve,
                              levels = c("1", "0"),
                              labels = c("I want to improve my memory or thinking skills", "0"))
d4$interest_inherit <- factor(d4$interest_inherit,
                              levels = c("1", "0"),
                              labels = c("I think I may inherit dementia from my parent or grandparent", "0"))
d4$interest_reduce_risk <- factor(d4$interest_reduce_risk,
                                  levels = c("1", "0"),
                                  labels = c("I want to reduce my risk of dementia", "0"))
d4$interest_worry <- factor(d4$interest_worry,
                            levels = c("1", "0"),
                            labels = c("I worry about my chances of getting dementia", "0"))
d4$completed <- factor(d4$completed,
                      levels = c("1", "0"),
                      labels = c("Completed", "Not completed"))

t1 <- table1::table1(~interest_decline + interest_dementia + interest_diagnosis + interest_improve +
                    interest_inherit + interest_reduce_risk + interest_worry | completed, d4)

t1

#table for experience_family
d4$interest_worry <- factor(d4$interest_worry,

```

```

      levels = c("1","0"),
      labels = c("I worry about my chances of getting dementia", "0"))
d1$completed <- factor(d1$completed,
      levels = c("1","0"),
      labels = c("Completed", "Not completed"))
d1$experience_family <- factor(d1$experience_family,
      levels = c("1","0"),
      labels = c("Relatives living with dementia", "0"))

```

```
t2 <- table1::table1(~experience_family | completed, d1)
```

```
t2
```

```
...
```

```
###TOPIC MODELLING
```

```
``{r}
```

```
load("combined_first_completion")
```

```
#use tidytext to unnest tokens, keeping only english language words
```

```
a <- combined_first_completion %>%
```

```
  unnest_tokens(word, outcome_already_applied_text)
```

```
#use tidytext to re-nest these tokens into clean original responses (produces "data" column containing these)
```

```
b <- a %>%
```

```
  nest(word)
```

```
#dplyr::rename clean responses column "text"
```

```
b <- b %>%
```

```

dplyr::mutate(outcome_already_applied_text_cleaned = purrr::map(b$data, unlist),
  outcome_already_applied_text_cleaned =
purrr::map_chr(outcome_already_applied_text_cleaned, paste, collapse = " ") %>%
dplyr::select(-data)

#correct NA values
b$outcome_already_applied_text_cleaned <- b$outcome_already_applied_text_cleaned %>%
  na_if("NA")

#remove NA values
b <- b %>% dplyr::filter(!is.na(outcome_already_applied_text_cleaned))

#dplyr::rename all_users_quiz_tm and save
combined_first_completion_tm <- b

save(combined_first_completion_tm, file = "combined_first_completion_tm")
```



Topic model cleaned responses to application question on feedback survey



```

```{r}
load("combined_first_completion_tm")

already_applied_topics <- combined_first_completion_tm

analysis_name <- "application_Q_tm"

# set the seed for the random number generator
set.seed(123)

thoughts.table <- function(x){
  a <- data.frame(rep(paste0("Topic ", x), length(thoughts[[x]])),

```


```

```

        meta$y[thoughts.index[[x]], meta$PostingUserId[thoughts.index[[x]]]
names(a) <- c("topic", "origin", "userid")
return(a)
}

ft <- function(x){
  findThoughts(fit, texts = as.character(out$meta$X2),
              n = 6, topics = x)
}

# define stop words
rm <- c(stopwords("en"))

# K is the number of topics to fit the model to
K <- c(21)

#originally fit 5 different numbers of topics and dplyr::selected 21 as the best number based on
theta, semantic coherence and exclusivity
#K <- c(5,10,15,21,30)

posts <- already_applied_topics
posts$X1 <- already_applied_topics$outcome_already_applied_text_cleaned

#Analysis preparation
processed <- textProcessor(posts$X1, metadata = posts, removestopwords = TRUE, removenumbers
= FALSE, stem = FALSE, onlycharacter = T, striphtml = T, verbose = F)
out <- prepDocuments(processed$documents, processed$vocab, processed$meta)
docs <- out$documents
vocab <- out$vocab
meta <- out$meta
proc_list <- list(processed, out, docs, vocab, meta)
save(proc_list, file = paste0(analysis_name, "_processed.RData"))

```

```
load(paste0(analysis_name, "_processed.RData"))
```

```
processed <- proc_list[[1]]
```

```
out <- proc_list[[2]]
```

```
docs <- proc_list[[3]]
```

```
vocab <- proc_list[[4]]
```

```
meta <- proc_list[[5]]
```

```
#Analysis
```

```
#Structural topic models were fitted according to prevalence of tokens. Models were fitted for *k* =  
`r K` topics and the results are reproduced for each analysis in this document. The fitted models are  
saved to file so that output for any model can be reproduced without the need to run the analysis  
again.
```

```
fit <- manyTopics(out$documents, out$vocab, K = K,
```

```
  prevalence = ~ 1, max.em.its = 75,
```

```
  data = out$meta, runs = 5, init.type = "Spectral",
```

```
  M = 20,
```

```
  frexw = 0.15,
```

```
  verbose = FALSE)
```

```
save(fit, file = paste0(analysis_name, "_stm0.RData"))
```

```
load(paste0(analysis_name, "_stm0.RData"))
```

```
#Calculate parameters for quality graphs
```

```
N <- 20 # number of top exemplars to compute theta from
```

```
m <- extractFit(fit, documents = docs, n = N)
```

```
#Plots
```

```
#Semantic coherence x Exclusivity
```

```
ggplot(m, aes(x = scale(m$semcoh), y = scale(m$exclusivity), colour = m$topic)) +
```

```
facet_wrap(~ K) +  
geom_point(alpha = 4/5)
```

```
#Semantic coherence x mean Theta
```

```
ggplot(m, aes(x = scale(m$semcoh), y = scale(m$theta), colour = m$topic)) +  
  facet_wrap(~ K) +  
  geom_point(alpha = 4/5)
```

```
#top words
```

```
for(i in 1:length(fit$out)){  
  print(summary(fit$out[[i]]))  
}
```

```
#top topics plots
```

```
plot(fit$out[[1]])  
#plot(fit$out[[2]])  
#plot(fit$out[[3]])  
#plot(fit$out[[4]])  
#plot(fit$out[[5]])
```

```
#Exemplars
```

```
thr = 0.1
```

```
for(i in fit$out){  
  ft <- findThoughts0(i, texts = as.character(out$meta[X1],  
    n = N, thresh = thr)  
  reflections_consent <- lapply(ft$index, function(x) data.frame(meta$PostingUserId[x],  
    meta$Text[x]))  
  j <- reshape2::melt(ft$index)  
  
  reflections <- data.frame(j$L1,
```

```
meta$user_id[j$value],  
meta$X1[j$value],  
round(unlist(ft$theta), 2))
```

```
names(reflections) <- c("topic", "user_id", "text", "theta")  
print(kable(reflections))  
}
```

```
#used the 21 topic model
```

```
...
```

```
``{r}
```

```
#extract original responses from key exemplars
```

```
a <- all_users_quiz %>% dplyr::filter(user_id == "77918")  
print(a$outcome_already_applied_text)
```

```
a <- all_users_quiz %>% dplyr::filter(user_id == "562748")  
print(a$outcome_already_applied_text)
```

```
a <- all_users_quiz %>% dplyr::filter(user_id == "229206")  
print(a$outcome_already_applied_text)
```

```
a <- all_users_quiz %>% dplyr::filter(user_id == "253520")  
print(a$outcome_already_applied_text)
```

```
a <- all_users_quiz %>% dplyr::filter(user_id == "141269")  
print(a$outcome_already_applied_text)
```

```
...
```

Clean responses to the feedback survey question "What was the best thing about the Preventing Dementia MOOC?"

```
``{r}
```

```
load("combined_first_completion")
```

```
#use tidytext to unnest tokens, keeping only english language words
```

```
a <- combined_first_completion %>%
```

```
  unnest_tokens(word, impression_best)
```

```
#use tidytext to re-nest these tokens into clean original responses (produces "data" column containing these)
```

```
b <- a %>%
```

```
  nest(data = c(word))
```

```
#dplyr::rename clean responses column "text"
```

```
b <- b %>%
```

```
  dplyr::mutate(impression_best_cleaned = purrr::map(b$data, unlist),
```

```
    impression_best_cleaned = purrr::map_chr(impression_best_cleaned, paste, collapse = "")) %>%
```

```
  dplyr::select(-data)
```

```
#correct NA values
```

```
b$impression_best_cleaned <- b$impression_best_cleaned %>%
```

```
  na_if("NA")
```

```
#remove NA values
```

```
b <- b %>% dplyr::filter(!is.na(impression_best_cleaned))
```

```
#dplyr::rename feedback_posts_tm and save
```

```
impression_best_tm <- b
```



```
save(impression_best_tm, file = "impression_best_tm")
```

```
...
```

Topic model cleaned responses to impression\_best question on feedback survey

```
``{r}
```

```
load("impression_best_tm")
```

```
already_applied_topics <- impression_best_tm
```

```
analysis_name <- "impression_best_tm"
```

```
# set the seed for the random number generator
```

```
set.seed(123)
```

```
thoughts.table <- function(x){
```

```
  a <- data.frame(rep(paste0("Topic ", x), length(thoughts[[x]])),
```

```
                  meta$y[thoughts.index[[x]], meta$PostingUserId[thoughts.index[[x]])])
```

```
  names(a) <- c("topic", "origin", "userid")
```

```
  return(a)
```

```
}
```

```
ft <- function(x){
```

```
  findThoughts(fit, texts = as.character(out$meta$X2),
```

```
              n = 6, topics = x)
```

```
}
```

```
# define stop words
```

```
rm <- c(stopwords("en"))
```

```
# K is the number of topics to fit the model to
```

```
#K <- c(5,10,15,21,30)
```

#originally fit 5 different numbers of topics and dplyr::selected 21 as the best number based on theta, semantic coherence and exclusivity

```
K <- c(21)
```

```
posts <- impression_best_tm
```

```
posts$X1 <- impression_best_tm$impression_best_cleaned
```

```
#Analysis preparation
```

```
processed <- textProcessor(posts$X1, metadata = posts, removestopwords = TRUE, removenumbers = FALSE, stem = FALSE, onlycharacter = T, striphtml = T, verbose = F)
```

```
out <- prepDocuments(processed$documents, processed$vocab, processed$meta)
```

```
docs <- out$documents
```

```
vocab <- out$vocab
```

```
meta <- out$meta
```

```
proc_list <- list(processed, out, docs, vocab, meta)
```

```
save(proc_list, file = paste0(analysis_name, "_processed.RData"))
```

```
load(paste0(analysis_name, "_processed.RData"))
```

```
processed <- proc_list[[1]]
```

```
out <- proc_list[[2]]
```

```
docs <- proc_list[[3]]
```

```
vocab <- proc_list[[4]]
```

```
meta <- proc_list[[5]]
```

```
#Analysis
```

#Structural topic models were fitted according to prevalence of tokens. Models were fitted for  $k = 1, \dots, K$  topics and the results are reproduced for each analysis in this document. The fitted models are saved to file so that output for any model can be reproduced without the need to run the analysis again.

```
fit <- manyTopics(out$documents, out$vocab, K = K,
```

```
prevalence = ~ 1, max.em.its = 75,
```

```

data = out$meta, runs = 5, init.type = "Spectral",
M = 20,
frexw = 0.15,
verbose = FALSE)

save(fit, file = paste0(analysis_name, "_stm0.RData"))

load(paste0(analysis_name, "_stm0.RData"))

#Calculate parameters for quality graphs
N <- 20 # number of top exemplars to compute theta from
m <- extractFit(fit, documents = docs, n = N)

#Plots
#Semantic coherence x Exclusivity
ggplot(m, aes(x = scale(m$semcoh), y = scale(m$exclusivity), colour = m$topic)) +
  facet_wrap(~ K) +
  geom_point(alpha = 4/5)

#Semantic coherence x mean Theta
ggplot(m, aes(x = scale(m$semcoh), y = scale(m$theta), colour = m$topic)) +
  facet_wrap(~ K) +
  geom_point(alpha = 4/5)

#top words
for(i in 1:length(fit$out)){
  print(summary(fit$out[[i]]))
}

#top topics plots
plot(fit$out[[1]])

```

```

#plot(fit$out[[2]])
#plot(fit$out[[3]])
#plot(fit$out[[4]])
#plot(fit$out[[5]])

#Exemplars
thr = 0.1

for(i in fit$out){
  ft <- findThoughts0(i, texts = as.character(out$meta$X1),
                      n = N, thresh = thr)

  reflections_consent <- lapply(ft$index, function(x) data.frame(meta$PostingUserId[x],
                                                                meta$Text[x]))

  j <- reshape2::melt(ft$index)

  reflections <- data.frame(j$L1,
                           meta$user_id[j$value],
                           meta$X1[j$value],
                           round(unlist(ft$theta), 2))

  names(reflections) <- c("topic", "user_id", "text", "theta")
  print(kable(reflections))
}
...
```{r}
#pull out original text of exemplars

a <- combined_first_completion %>% dplyr::filter(user_id == "17345")
print(a$impression_best)

a <- combined_first_completion %>% dplyr::filter(user_id == "220252")

```

```
print(a$impression_best)
```

```
a <- combined_first_completion %>% dplyr::filter(user_id == "77116")
```

```
print(a$impression_best)
```

```
a <- combined_first_completion %>% dplyr::filter(user_id == "102149")
```

```
print(a$impression_best)
```

```
...
```

Clean responses to the feedback survey question "What was the worst thing about the Preventing Dementia MOOC?"

```
``{r}
```

```
load("combined_first_completion")
```

```
#use tidytext to unnest tokens, keeping only english language words
```

```
a <- combined_first_completion %>%
```

```
  unnest_tokens(word, impression_worst)
```

```
#use tidytext to re-nest these tokens into clean original responses (produces "data" column containing these)
```

```
b <- a %>%
```

```
  nest(data = c(word))
```

```
#dplyr::rename clean responses column "text"
```

```
b <- b %>%
```

```
  dplyr::mutate(impression_worst_cleaned = purrr::map(b$data, unlist),
```

```
    impression_worst_cleaned = purrr::map_chr(impression_worst_cleaned, paste, collapse = "")) %>%
```

```
  dplyr::select(-data)
```

```
#correct NA values
```

```
b$impression_worst_cleaned <- b$impression_worst_cleaned %>%  
  na_if("NA")
```

```
#remove NA values
```

```
b <- b %>% dplyr::filter(!is.na(impression_worst_cleaned))
```

```
#dplyr::rename feedback_posts_tm and save
```

```
impression_worst_tm <- b
```

```
save(impression_worst_tm, file = "impression_worst_tm")
```

```
...
```

```
Topic model cleaned responses to impression_best question on feedback survey
```

```
``{r}
```

```
load("impression_worst_tm")
```

```
already_applied_topics <- impression_worst_tm
```

```
analysis_name <- "impression_worst_tm"
```

```
# set the seed for the random number generator
```

```
set.seed(123)
```

```
thoughts.table <- function(x){
```

```
  a <- data.frame(rep(paste0("Topic ", x), length(thoughts[[x]])),
```

```
                  meta$y[thoughts.index[[x]], meta$PostingUserId[thoughts.index[[x]])])
```

```
  names(a) <- c("topic", "origin", "userid")
```

```
  return(a)
```

```
}
```

```
ft <- function(x){
```

```

findThoughts(fit, texts = as.character(out$meta$X2),
             n = 6, topics = x)
}

# define stop words
rm <- c(stopwords("en"))

# K is the number of topics to fit the model to
#K <- c(5,10,15,21,30)

#originally fit 5 different numbers of topics and dplyr::selected 21 as the best number based on
theta, semantic coherence and exclusivity
K <- c(21)

posts <- impression_worst_tm
posts$X1 <- impression_worst_tm$impression_worst_cleaned

#Analysis preparation
processed <- textProcessor(posts$X1, metadata = posts, removestopwords = TRUE, removenumbers
= FALSE, stem = FALSE, onlycharacter = T, striphtml = T, verbose = F)
out <- prepDocuments(processed$documents, processed$vocab, processed$meta)
docs <- out$documents
vocab <- out$vocab
meta <- out$meta
proc_list <- list(processed, out, docs, vocab, meta)
save(proc_list, file = paste0(analysis_name, "_processed.RData"))

load(paste0(analysis_name, "_processed.RData"))
processed <- proc_list[[1]]
out <- proc_list[[2]]
docs <- proc_list[[3]]
vocab <- proc_list[[4]]

```

```
meta <- proc_list[[5]]
```

```
#Analysis
```

```
#Structural topic models were fitted according to prevalence of tokens. Models were fitted for *k* =  
`r K` topics and the results are reproduced for each analysis in this document. The fitted models are  
saved to file so that output for any model can be reproduced without the need to run the analysis  
again.
```

```
fit <- manyTopics(out$documents, out$vocab, K = K,  
  prevalence = ~ 1, max.em.its = 75,  
  data = out$meta, runs = 5, init.type = "Spectral",  
  M = 20,  
  frexw = 0.15,  
  verbose = FALSE)
```

```
save(fit, file = paste0(analysis_name, "_stm0.RData"))
```

```
load(paste0(analysis_name, "_stm0.RData"))
```

```
#Calculate parameters for quality graphs
```

```
N <- 20 # number of top exemplars to compute theta from
```

```
m <- extractFit(fit, documents = docs, n = N)
```

```
#Plots
```

```
#Semantic coherence x Exclusivity
```

```
ggplot(m, aes(x = scale(m$semcoh), y = scale(m$exclusivity), colour = m$topic)) +  
  facet_wrap(~ K) +  
  geom_point(alpha = 4/5)
```

```
#Semantic coherence x mean Theta
```

```
ggplot(m, aes(x = scale(m$semcoh), y = scale(m$theta), colour = m$topic)) +  
  facet_wrap(~ K) +
```



```
geom_point(alpha = 4/5)
```

```
#top words
```

```
for(i in 1:length(fit$out)){  
  print(summary(fit$out[[i]]))  
}
```

```
#top topics plots
```

```
plot(fit$out[[1]])  
#plot(fit$out[[2]])  
#plot(fit$out[[3]])  
#plot(fit$out[[4]])  
#plot(fit$out[[5]])
```

```
#Exemplars
```

```
thr = 0.1
```

```
for(i in fit$out){  
  ft <- findThoughts0(i, texts = as.character(out$meta$X1),  
                      n = N, thresh = thr)  
  
  reflections_consent <- lapply(ft$index, function(x) data.frame(meta$PostingUserId[x],  
                                                                meta$Text[x]))  
  
  j <- reshape2::melt(ft$index)  
  
  reflections <- data.frame(j$L1,  
                           meta$user_id[j$value],  
                           meta$X1[j$value],  
                           round(unlist(ft$theta), 2))  
  
  names(reflections) <- c("topic", "user_id", "text", "theta")  
  print(kable(reflections))
```

```
}
```

```
...
```

```
``{r}
```

```
a <- combined_first_completion %>% dplyr::filter(user_id == "561492")  
print(a$impression_worst)
```

```
a <- combined_first_completion %>% dplyr::filter(user_id == "187223")  
print(a$impression_worst)
```

```
a <- combined_first_completion %>% dplyr::filter(user_id == "553377")  
print(a$impression_worst)
```

```
a <- combined_first_completion %>% dplyr::filter(user_id == "42941")  
print(a$impression_worst)
```

```
a <- combined_first_completion %>% dplyr::filter(user_id == "106186")  
print(a$impression_worst)
```

```
...
```
